# Contact surveys reveal heterogeneities in age-group contributions to SARS-CoV-2 dynamics in the United States

Taylor Chin<sup>1</sup>, Dennis M. Feehan<sup>2</sup>, Caroline O. Buckee<sup>1</sup>, and Ayesha S. Mahmud<sup>2,\*</sup>

<sup>1</sup>*Center for Communicable Disease Dynamics, Department of Epidemiology, Harvard TH Chan School of Public Health, Boston, MA, US*

<sup>2</sup>*Department of Demography, University of California, Berkeley, California USA*

\**Corresponding author: Ayesha S. Mahmud, mahmuda@berkeley.edu*

September 25, 2021

## Abstract

SARS-CoV-2 is spread primarily through person-to-person contacts. Quantifying population contact rates is important for understanding the impact of physical distancing policies and for modeling COVID-19, but contact patterns have changed substantially over time due to shifting policies and behaviors. There are surprisingly few empirical estimates of age-structured contact rates in the United States both before and throughout the COVID-19 pandemic that capture these changes. Here, we use data from six waves of the Berkeley Interpersonal Contact Survey (BICS), which collected detailed contact data between March 22, 2020 and February 15, 2021 across six metropolitan designated market areas (DMA) in the United States. Contact rates were low across all six DMAs at the start of the pandemic. We find steady increases in the mean and median number of contacts across these localities over time, as well as a greater proportion of respondents reporting a high number of contacts. We also find that young adults between ages 18 and 34 reported more contacts on average compared to other age groups. The 65 and older age group consistently reported low levels of contact throughout the study period. To understand the impact of these changing contact patterns, we simulate COVID-19 dynamics in each DMA using an age-structured mechanistic model. We compare results from models that use BICS contact rate estimates versus commonly used alternative contact rate sources. We find that simulations parameterized with BICS estimates give insight into time-varying changes in relative incidence by age group that are not captured in the absence of these frequently updated estimates. We also find that simulation results based on BICS estimates closely match observed data on the age distribution of cases, and changes in these distributions over time. Together these findings highlight the role of different age groups in driving and sustaining SARS-CoV-2 transmission in the U.S. We also show the utility of repeated contact surveys in revealing heterogeneities in the epidemiology of COVID-19 across localities in the United States.

**Keywords:** COVID-19; contact rates; mathematical modeling; age-structured model

## 1 Introduction

2 SARS-CoV-2, the causative agent for COVID-19, is transmitted primarily through close person-to-person interactions  
3 (Cevik, Kuppalli, Kindrachuk, & Peiris, 2020). The transmission dynamics of SARS-CoV-2, and subsequent mor-  
4 bidity and mortality from COVID-19, are therefore fundamentally dependent on changing patterns of interpersonal

5 interaction in the population. The multiple waves that have characterized the epidemic so far in the USA have been  
6 caused by shifting contact rates, as populations have responded to the pandemic with various physical distancing  
7 policies. Quantifying population contact patterns and changes in these patterns over time is especially important for  
8 identifying demographic groups that are driving and sustaining disease transmission in a population.

9 Age-specific contact patterns are especially relevant for COVID-19 because clinical outcomes, and likely suscep-  
10 tibility to infection, vary by age (Davies et al., 2020). While the age structure of COVID-19 infections has changed  
11 over time, with more cases reported among younger age groups during the summer of 2020 compared to the initial  
12 wave (Boehmer, 2020), evidence is limited regarding the relative importance of changing testing rates versus changing  
13 contact patterns in driving this finding. Further, the extent to which different demographic groups shifted in driving  
14 and sustaining transmission over time remains unclear (Monod et al., 2021).

15 The unprecedented adoption of physical distancing policies during the COVID-19 pandemic has, meanwhile,  
16 created dynamic contact rates and patterns that are challenging to capture in the absence of frequently collected  
17 data. Interpersonal contact rates declined significantly after lockdown and shelter-in-place mandates were announced  
18 in US cities in mid-March, and slowly increased over the summer after restrictions began to ease by late April (Feehan  
19 & Mahmud, 2021). There is, however, considerable heterogeneity across the US in terms of both the infection and  
20 mortality burden of COVID-19, as well as the types of non-pharmaceutical interventions (NPI) adopted. As such,  
21 quantifying the variation in contact rates between cities over time is key to understanding spatial and temporal  
22 variations in contact patterns and infection burden by age and demographics, as well as the effectiveness of physical  
23 distancing policies in different localities over time.

24 Surveys have been used previously to quantify population contact rates to understand transmission dynamics  
25 of respiratory pathogens (Rohani, Zhong, & King, 2010; Kucharski et al., 2014; Eames, Tilston, Brooks-Pollock, &  
26 Edmunds, 2012; Melegaro, Jit, Gay, Zagheni, & Edmunds, 2011). In the absence of existing surveys for the US,  
27 many age-structured mathematical models of SARS-CoV-2 transmission in the US rely on pre-pandemic estimates  
28 of contact patterns (Hay, Haw, Hanage, Metcalf, & Mina, 2020; Miller, Becker, Grenfell, & Metcalf, 2020; Enns  
29 et al., 2020), based on the POLYMOD study in Europe (Mossong et al., 2008), or on synthetic (modeled) contact  
30 rates (Davies et al., 2020; Bubar et al., 2021; Prem et al., 2020; Larremore et al., 2021) based on POLYMOD and  
31 country-specific socio-demographic data (Prem, Cook, & Jit, 2017; Prem et al., 2021). While there has been an  
32 increase in contact surveys conducted globally since the landmark POLYMOD study (Hoang et al., 2019), there have  
33 been few studies conducted in the US that allow for estimation of age-specific contact patterns (Zagheni et al., 2008;  
34 A. Dorelien, Ramen, & Swanson, 2020), and there have been no studies to date in the US covering more than one  
35 locality (A. M. Dorelien et al., 2020) over the course of the COVID-19 pandemic. In general, there is a deficit in  
36 contact survey studies conducted in the US both before the pandemic and especially during its course.

37 To this end, the ongoing Berkeley Interpersonal Contact Survey (BICS) has been collecting detailed contact data  
38 in the US over the course of the COVID-19 pandemic. The BICS consists of six survey waves that have collected  
39 information on respondents' total number of contacts, demographic information about their contacts, and the nature  
40 of these contacts (e.g. location, duration). Existing work has used BICS data to quantify changes in contact rates  
41 over time and to assess the effectiveness of social distancing measures nationally (Feehan & Mahmud, 2021). Here,  
42 we focus on the BICS quota samples collected from six US designated market areas (DMA) surrounding Atlanta,  
43 the San Francisco Bay Area, Boston, New York City, Philadelphia, and Phoenix. We first quantify overall contact  
44 patterns across the six DMAs over time to understand the impact of NPIs on interpersonal contact. We then use these  
45 data to parameterize an age-structured mechanistic model of SARS-CoV-2 transmission to understand changes in  
46 age-specific infection burden over time. We show that the median number of reported contacts was fairly stable over  
47 time across DMAs, but that the mean number of reported contacts generally increased over time. Moreover, across  
48 DMAs, 18-34 year olds reported the highest mean number of contacts compared to other age groups in most survey  
49 waves. Our simulation results from a mathematical model parameterized with empirical contact rates from the BICS  
50 study closely match observed data on the proportion of COVID-19 cases by age group; in contrast, simulation results  
51 from a model parameterized with alternative contact rate estimates commonly used in the literature are unable to

52 capture the shift in proportion of cases by age group. This approach provides a way to improve model estimates  
53 during outbreaks, which will be critical for responding to COVID-19 and future outbreaks.

## 54 Results

55 We use data from six waves of the BICS study collected between March 22 and April 8, 2020 (Wave 0); between April  
56 10 and May 4, 2020 (Wave 1); between June 17 and 23, 2020 (Wave 2); between September 11 and 26, 2020 (Wave  
57 3); between November 29 and December 16, 2020 (Wave 4); and between February 7 and February 15, 2021 (Wave  
58 5). We quantified the mean and median number of contacts in each BICS survey wave across the six DMAs (Figure  
59 1A). Despite the differences in COVID-19 epidemic trajectories and NPIs enforced across the different DMAs, all  
60 localities show similar dynamics in the mean and median number of reported contacts over time. Although median  
61 values across DMAs were fairly stable across survey waves, the means varied substantially because the distribution of  
62 the number of contacts was highly right-skewed across all locations, with the mean number of contacts exceeding the  
63 median for most survey waves. These differences were driven by changes in contact rates among those reporting large  
64 numbers of contacts per day (Figure 1B). In the first wave, the vast majority of respondents reported having five or  
65 fewer contacts per day, but the mean generally increased across survey waves and peaked in Wave 3 (September 11-26,  
66 2020) for Atlanta, the Bay Area, New York City, and Philadelphia. Respondents in Atlanta reported the highest  
67 mean number of contacts during the BICS study at 7.4 contacts in Wave 3. The mean number of contacts in Boston  
68 increased relatively steadily to a value of 6.1 by Wave 5 (February 7-15, 2021). Phoenix respondents, meanwhile,  
69 reported a peak in Wave 4 at 6.2 mean contacts (November 29-December 16, 2020). While the median number of  
70 reported contacts remained relatively stable, the distribution of the number of contacts changed across survey waves,  
71 with a larger proportion of respondents reporting more than five contacts over time.

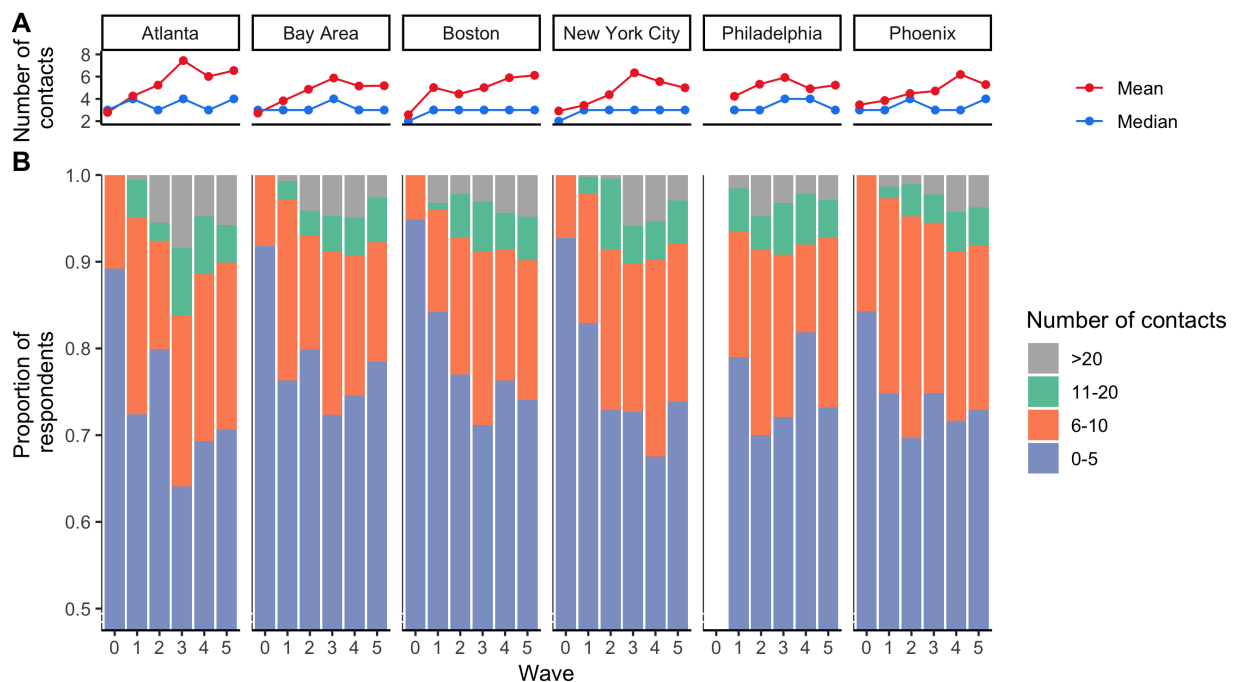

Figure 1: Descriptive analyses of the number of contacts estimated for the 6 DMAs across BICS Waves 0-5. A) Mean number of contacts (red line) and median number of contacts (blue line) reported during survey Waves 0-5 in each DMA in the BICS study. B) Proportion of BICS respondents reporting 0-5, 6-10, 11-20, and >20 contacts during survey Waves 0-5 in each DMA of the BICS study. The y-axis is truncated and begins at the value 0.5.

72 To investigate factors related to reporting a high number of contacts, we fit a logistic regression to the outcome  
73 of reporting more than seven contacts (Supplementary Figure S2). The cutoff of seven contacts represents the 80th  
74 percentile in the BICS data across survey waves and DMAs. We find that compared to the reference group of 18-24  
75 year olds, 25-34 and 35-44 year olds had a higher odds of reporting more than seven contacts, while 65+ year olds  
76 were least likely to report more than seven contacts. Atlanta residents had a higher odds of reporting more than  
77 seven contacts compared to the other DMAs in the BICS study. Black and other non-Hispanics had a lower odds  
78 of reporting more than seven contacts relative to White non-Hispanics and Hispanics. Consistent with trends in the  
79 mean number of contacts, the odds of respondents reporting more than seven contacts increased from Wave 0 to  
80 Wave 3 and 4 before slightly declining. Males had a higher odds relative to females of reporting more than seven  
81 contacts; and the odds of reporting more than seven contacts was higher on a weekday compared to the weekend.

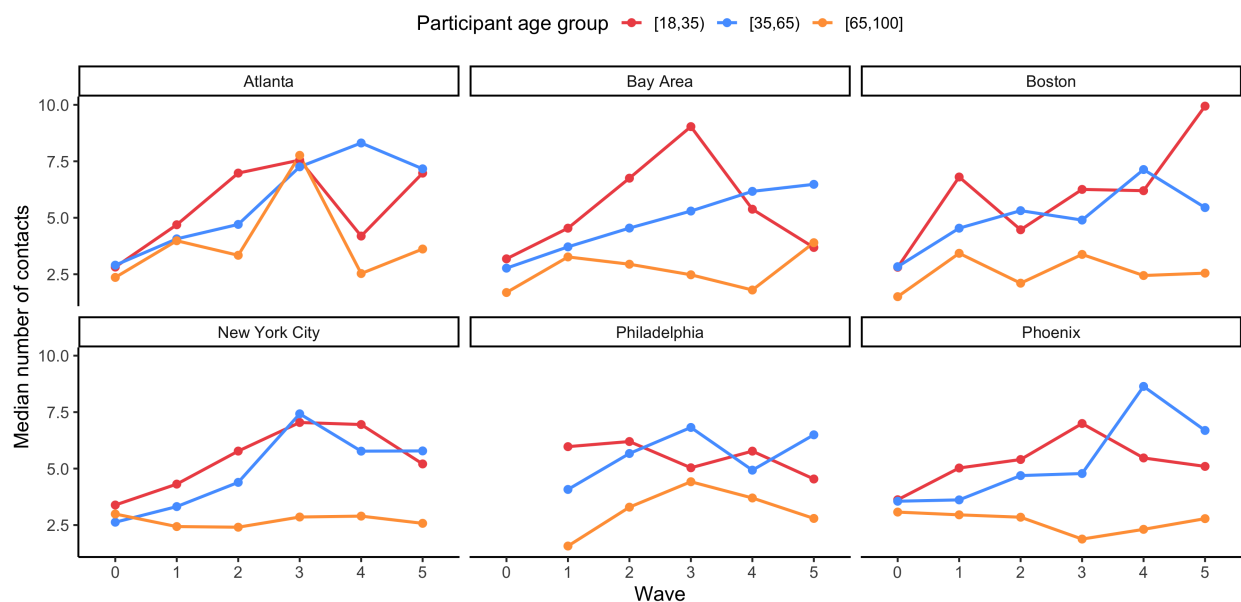

Figure 2: The mean number of contacts reported by BICS participants aged 18-34, 35-64, and 65+ years old during survey Waves 0-5 in each DMA of the BICS study.

82 To understand the demographic groups driving and sustaining transmission, we analyzed the mean number of  
83 reported contacts by respondent age groups. Across DMAs, 18-34 year olds consistently reported the highest mean  
84 number of contacts (Figure 2). In particular, the mean number of contacts reported by 18-34 year olds in the Bay  
85 Area increased from 3.2 mean contacts in Wave 0 to a peak of 9.0 mean contacts in Wave 3 before declining. The  
86 middle age group of 35-64 year olds in general exhibited a steady increase in the mean number of contacts over  
87 time across DMAs. In Phoenix and Atlanta, 35-64 year olds had the highest mean number of contacts in Waves 4  
88 and 5. Lastly, 65+ year olds consistently reported the lowest mean number of contacts relative to other age groups  
89 across time and DMAs. Supplementary Figure S3 shows the corresponding figure with the mean number of reported  
90 contacts for five age groups.

91 Importantly, transmission dynamics depend not only on the mean number of contacts reported by age group, but  
92 also on which age groups interact with one another due to age-specific differences in susceptibility to infection and  
93 likelihood of presenting with symptomatic disease. The age-structured contact matrices estimated for all reported  
94 contacts and reported non-household contacts in each survey wave and DMA are shown in Supplementary Figures  
95 S4 and S5. The age-structured matrices are similar across DMAs, with consistent evidence of assortative mixing and  
96 a higher mean number of contacts reported by 25-34 and 35-44 year olds starting in Wave 3.

97 To understand the impact of changing contact rates and patterns on disease burden, we simulated SARS-CoV-

It is made available under a [CC-BY-NC-ND 4.0 International license](https://creativecommons.org/licenses/by-nc-nd/4.0/).

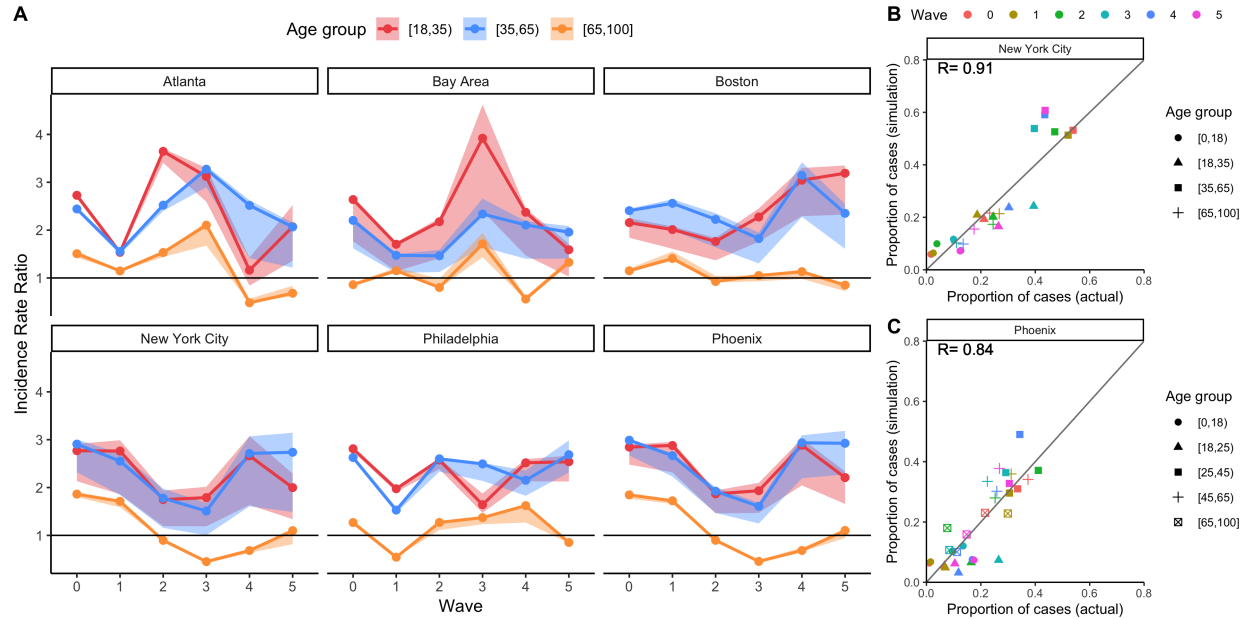

Figure 3: Mechanistic model results of total incidence for four age groups using BICS contact rate data, with comparisons to observed data where possible. A) Simulated incidence rate ratio (IRR) representing total incidence for each DMA and BICS survey wave comparing 18-34, 35-64, and 65+ year olds to the reference age group of 0-17 year olds. 90% uncertainty bounds are estimated from running 1,000 simulations with 1,000 different values of  $R_0$ . The mathematical model is parameterized using empirical contact rate estimates from the BICS study. B) Scatterplot comparing the proportion of COVID-19 cases in each age group (represented by symbol shape) and survey wave (represented by symbol color) estimated in the simulation based on clinical incidence vs. reported in actual epidemiological data for New York City. The empirical data for New York City represent the proportion of positive COVID-19 molecular tests by age group for New York City. C) Scatterplot comparing the proportion of COVID-19 cases in each age group (represented by symbol shape) and survey wave (represented by symbol color) estimated in the simulation based on clinical incidence vs. reported in actual epidemiological data for Phoenix. The empirical data for Phoenix represent the proportion of confirmed and probable COVID-19 cases reported in Maricopa County.

98 2 transmission in each of the six DMAs using an age-structured mechanistic model parametrized with the BICS  
 99 contact rate data. We present the model results in terms of four age groups for visual simplicity given the similarity  
 100 in patterns between certain age groups, but the results for all six age groups are presented in Supplementary Figures  
 101 S6 and S7. We present simulation results in terms of the reference group of 0-17 year olds, and also compare with  
 102 observed data where possible.

103 We find that 18-34 year olds and 35-64 year olds had a higher total incidence (including both clinical and  
 104 subclinical cases) of COVID-19 relative to the reference group of 0-17 year olds across DMAs and time (Figure 3A).  
 105 Despite their much higher susceptibility to infection, the oldest age group of 65+ year olds had comparable or lower  
 106 total incidence relative to 0-17 year olds in the simulation results, particularly in later waves, as a result of 65+ year  
 107 olds' substantially lower contact rates. When we look at clinical incidence, as expected, we find that all age groups  
 108 have higher clinical incidence relative to the reference group of 0-17 year olds across survey waves due to the model's  
 109 incorporation of age-dependent propensity to have clinical symptoms (Supplementary Figure S8).

110 Where possible based on data availability, we compare the proportion of simulated cases by age group using  
 111 clinical incidence results and the proportion of observed COVID-19 cases by age group. We find a very high correlation  
 112 between the simulated and observed proportions of COVID-19 cases by age group for both New York City and Phoenix  
 113 (Figures 3B and 3C). Our simulations are also consistent with the changing proportion of clinical cases observed in

114 empirical data. For instance, we are able to simulate the observed decline in the proportion of cases in the 65+ age  
115 group in New York and Phoenix after the first wave of the outbreak in March to May 2020 (Supplementary Figure  
116 S9). This suggests that this observed trend was not simply the result of changes in testing rates by age group, but  
117 rather a result of the very low contact rates in the 65 and older age group compared to younger age groups. In the  
118 Bay Area, our simulations captured the relatively high proportion of cases among 25-45 year olds, again reflecting  
119 the age group's relatively higher contact rates.

120 The changes in the incidence rate ratio across survey waves and DMAs that are evident in Figure 3 contrast with  
121 the time- and DMA-invariant estimates from the simulation results when the model is parameterized with alternative  
122 contact rate estimates commonly used in the literature (Supplementary Figure S10). Although these alternative  
123 contact matrices are scaled at each wave to change the intensity of contacts based on information from the BICS  
124 survey, the age-structured contact patterns are invariant over time, highlighting the need for frequent up-to-date  
125 empirical estimates. As a result, the estimated IRRs for different age groups relative to the youngest age group of  
126 0-17 year olds are stable over time, and differences between DMAs are driven by differences in their demography  
127 rather than changes in the contact patterns.

## 128 Discussion

129 The ongoing COVID-19 pandemic and physical distancing policies have fundamentally altered interpersonal interac-  
130 tions across the US and globally. Yet, little is known about how contact rates and patterns have changed and the  
131 implications for SARS-CoV-2 transmission dynamics. We studied contact rate patterns across six DMAs in the US  
132 over the course of the COVID-19 pandemic, and modeled the impact of changing contact patterns on incidence across  
133 different age groups. We find that the median and mean number of contacts reported across survey waves steadily  
134 increased from March 2020 to September 2020 before declining slightly. Mean contact rate differences were driven by  
135 shifting distributions of rates, with some individuals reporting many contacts per day. We find consistent differences  
136 across age groups; 18-34 year olds reported among the highest mean number of contacts across survey waves in all  
137 DMAs, while 65+ year olds reported the lowest. The similarity in contact patterns across DMAs is surprising given  
138 their heterogeneity in the timing and reinforcement of different physical distancing policies, although this may reflect  
139 the fact that the six DMAs included in the BICS study are all large, urban metropolitan areas.

140 Our simulation results suggest time- and DMA-varying differences in the relative incidence of COVID-19 infections  
141 by age groups. Despite 65+ year olds having a higher susceptibility to infection relative to other age groups, they  
142 had comparable or lower incidence rates of COVID-19 in our simulations relative to younger age groups due to their  
143 substantially lower mean daily contact rates. In contrast to the results from the model parameterized with empirical  
144 contact rate estimates from BICS, the simulation results using synthetic contact data fail to capture shifts in the  
145 proportion of COVID-19 cases by age group. This difference reinforces the value of collecting empirical contact rate  
146 estimates in order to capture spatial and temporal changes in contact rates and patterns.

147 This analysis has several limitations to consider. First, BICS uses a quota sample from an online panel instead of  
148 a probability sample. However, respondent-level calibration weights were estimated to adjust for sample composition  
149 to produce representative surveys for each DMA. Moreover, information bias is a concern for contact surveys due to  
150 difficulties with recall and social desirability bias, which may be expected to be especially pronounced in the middle  
151 of a pandemic. Respondents may therefore have under-reported their number of contacts in the survey. At the same  
152 time, the BICS survey captures only two-way conversational and physical contacts. Other types of contacts that  
153 might be relevant to SARS-CoV-2 transmission, including, for example, contacts that happen from being in close  
154 proximity to others, were not captured in this analysis. The analyses also did not take into account the nature of these  
155 conversational and physical contacts, such as mask wearing, distance maintained during the contact, and duration of  
156 the contact. In terms of generalizability, the BICS is only offered in English, limiting the ability to generalize results  
157 to Americans whose primary language is not English. Lastly, since children, defined as less than age 18, are not  
158 included in the BICS, previously developed methods were used to fill missing data values for the youngest age group.

159 A key limitation of the simulation results is the significant parameter uncertainty of the compartmental model.  
160 To capture some of this uncertainty, we used a range of values for our estimate of  $R_0$ . Our method for estimating the  
161 reproduction number (Wallinga & Teunis, 2004) assumes that all cases in our dataset acquired infections from others  
162 in the dataset, and it thereby excludes unreported cases and asymptomatic individuals; this may bias the estimate  
163 if the proportion of unreported cases changed over time. Lastly, comparisons between the proportion of simulated  
164 cases by age group and the proportion of observed COVID-19 cases are difficult to make due to differences in age  
165 categorization of the observed data, as well as temporal changes in testing rates by age, which are not captured in  
166 our model. We therefore only presented these comparisons for New York City and Phoenix.

167 Contact rate estimates from the BICS study offer unique insight into how age-structured contact patterns have  
168 changed across time and localities in the US during the COVID-19 pandemic. Since the BICS study is an ongoing  
169 effort, data from additional survey waves will continue to provide invaluable information on how contact rate patterns  
170 continue to change as the COVID-19 pandemic evolves. Examining whether and when contact rates return to pre-  
171 pandemic levels, and understanding the relationship between contact rates and NPIs for SARS-CoV-2 and other  
172 respiratory pathogens, are key directions for future research.

## 173 **Materials and Methods**

### 174 **Survey Population**

175 The BICS data collection occurred in six waves: between March 22 and April 8, 2020 (Wave 0); between April 10  
176 and May 4, 2020 (Wave 1); between June 17 and 23, 2020 (Wave 2); between September 11 and 26, 2020 (Wave  
177 3); between November 29 and December 16, 2020 (Wave 4); and between February 7 and February 15, 2021 (Wave  
178 5). A total of 15,712 respondents were surveyed in the US (Wave 0  $n=1,437$ ; Wave 1  $n=2,627$ ; Wave 2  $n=2,431$ ;  
179 Wave 3  $n=3,248$ ; Wave 4  $n=2,993$ ; Wave 5  $n=2,976$ ) (Supplementary Table S1). Respondents were recruited using  
180 Lucid, an online panel provider. Two samples were obtained in each survey wave: 1) a quota sample intended to  
181 be representative of the US (national sample); and 2) smaller quota samples from the DMAs of New York City, the  
182 San Francisco Bay Area, Atlanta, Phoenix, Boston, and Philadelphia (city-level samples). Philadelphia was added in  
183 Wave 1.

184 The survey methodology is described in more detail in Feehan and Mahmud (2021) (Feehan & Mahmud, 2021).  
185 In brief, respondents were asked to report the number of people with whom they had contact on the day before the  
186 survey interview. Contacts were defined as a two-way conversation with three or more words in the physical presence  
187 of another person. Starting in Wave 1, the survey also asked about physical contacts. Demographic information was  
188 collected on respondents (e.g. age, gender, race/ethnicity, household size, educational status). Respondents were  
189 asked to provide detailed information on up to three of their reported contacts, including demographic information of  
190 their contacts, as well as the duration and location of the contact. In Wave 0, respondents reported all contacts, and  
191 then reported how many of their contacts were non-household members. Beginning in Wave 1, respondents provided  
192 a household roster and then reported their non-household contacts.

193 All survey respondents provided informed consent and the project was approved by the UC Berkeley IRB (Protocol  
194 2020-03-13128).

### 195 **Survey Weights**

196 Supplementary Table S2 presents the unweighted survey population's demographics. Since some respondents were  
197 oversampled in select cities, weights were used to account for sample composition, as previously described (Feehan  
198 & Mahmud, 2021). Respondent-level weights were estimated to represent the number of people that respondent  $i$   
199 represents in their city's general population. These weights were designed based on a model-based inference approach,  
200 in which pseudo-probabilities of inclusion are calculated, and then calibrated based on age categories, sex, age  
201 by sex interactions, educations, race, Hispanicity, household size category, and whether the respondent lives in a

202 rural/suburban/urban county. We performed the calibration using the R packages `autumn` and `leafpepr` (Rossell,  
203 n.d.; Aaron, n.d.). Characteristics of survey respondents in the unweighted vs. weighted samples are shown in  
204 Supplementary Figure S1. Contact-level weights were estimated since detailed information on reported contacts was  
205 only collected for a subset of a respondent’s total number of contacts (up to three contacts).

## 206 Construction of Contact Matrices

207 The methods for estimating age-structured contact matrices for each wave and DMA of the BICS study have been  
208 previously described (Feehan & Mahmud, 2021), and are summarized here. Respondents were grouped into six age  
209 categories: 0-17, 18-24, 25-34, 35-44, 45-64, and 65+. The raw contact matrix  $\mathbf{M}$  has entries  $m_{ij}$ , representing the  
210 average number of daily contacts between respondents in age group,  $i$ , with their reported contacts in age group,  $j$ .  
211 We adjusted for survey weights, such that  $m_{ij}$  was calculated as:

$$m_{ij} = \frac{\sum_{t=1}^{T_i} w_{t,i} y_{t,j}}{\sum_{t=1}^{T_i} w_{t,i}} \quad (1)$$

212 where  $w_{t,i}$  is the weight for reports made by participant  $t$ , in age group  $i$ , and  $y_{t,j}$  is the number of reported contacts  
213 made by respondent  $t$  in age group  $j$ .  $T_i$  is the total number of respondents in age group  $i$ .

214 We next created a reciprocal contact matrix  $\mathbf{C}$ , such that on the population level the total number of contacts that  
215 respondents in age group  $i$  report with individuals in age group  $j$  is equal to the number of contacts that respondents  
216 in age group  $j$  report with individuals in age group  $i$ :

$$c_{ij} = \frac{m_{ij}N_i + m_{ji}N_j}{2N_i} \quad (2)$$

217 where  $c_{ij}$  are the entries of the reciprocal contact matrix,  $\mathbf{C}$ , and  $N_i$  and  $N_j$  the population size in age class  $i$  and  $j$ ,  
218 respectively.

219 Since children, defined as <18 years old, were excluded from the BICS study, using methods previously developed  
220 and used (Klepac et al., 2020; Jarvis et al., 2020), we imputed the within age group average number of contacts for  
221 the youngest age group. Briefly, for each wave and DMA of the BICS study, we calculated the ratio of the dominant  
222 eigenvalue of the contact matrix estimated from the BICS data to the dominant eigenvalue of the contact matrix  
223 estimated for the US from Prem et al. (2021) (Prem et al., 2021), with school contacts removed to reflect school  
224 closure policies in 2020. The matrices for this calculation were subset to exclude age groups with missing values. We  
225 then multiplied the within age group average number of contacts for the youngest age group from Prem et al. (2021)  
226 by this ratio.

## 227 Logistic Regression

228 We examined factors associated with the probability of reporting >7 contacts, where seven represents the 80th  
229 percentile in the BICS data across all waves and DMAs. We fit a logistic regression model using maximum likelihood:

$$\text{logit}(\mu_i) = \alpha + \mathbf{X}_i^T \beta \quad (3)$$

230 where  $\mu_i$  is the probability of respondent  $i$  reporting >7 contacts,  $\mathbf{X}_i$  is a vector of covariates, including age group,  
231 DMA, gender, race/ethnicity (Non-Hispanic White, Non-Hispanic Black/Hispanic/Non-Hispanic Other), survey wave,  
232 and whether the survey day was a weekday, and  $\beta$  is a vector of the estimated coefficients.



## 233 Age-structured Mechanistic Transmission Model

### 234 Model Structure

235 We used an age-structured Susceptible-Exposed-Infectious-Recovered (SEIR) model for each of the six DMAs (Figure  
 236 4. The SEIR model has two infectious compartments – clinical and subclinical. Consistent with the definitions used  
 237 in Davies et al. (2020) (Davies et al., 2020), we defined clinical, infectious individuals as symptomatic individuals,  
 238 while subclinical, infectious individuals include both pauci-symptomatic and asymptomatic individuals who are likely  
 239 to remain undetected by surveillance. For all compartments the index  $i$  references the age category (0-17, 18-24,  
 240 25-34, 35-44, 45-64, and 65+). Individuals in the susceptible compartment,  $S_i$ , transition to the exposed (but not yet  
 241 infectious) compartment,  $E_i$ , through contact with a clinical or subclinical infectious individual at rate  $\lambda_i(t)$ , which  
 242 is a time-varying, age-group-specific force of infection. Individuals then transition to either the clinical or subclinical  
 243 infectious compartment ( $I_i^C, I_i^{Sc}$ ) at rate  $\sigma$ , which is the inverse of the mean latent period. Individuals in the infectious  
 244 compartments recover at rate  $\gamma$ , which is the inverse of the mean infectious period. Two assumptions incorporated in  
 245 the model are that subclinical infectious individuals are less infectious than clinical infectious individuals (represented  
 246 by the reduction factor  $\alpha$ ), and that the probability of being a clinical vs. subclinical infectious individual is dependent  
 247 only on age. This model structure is in line with compartmental models frequently used in existing COVID-19 research  
 248 (Davies et al., 2020; Miller et al., 2020; Prem et al., 2020). Parameters values used in the model are described in  
 249 Supplementary Table S3.

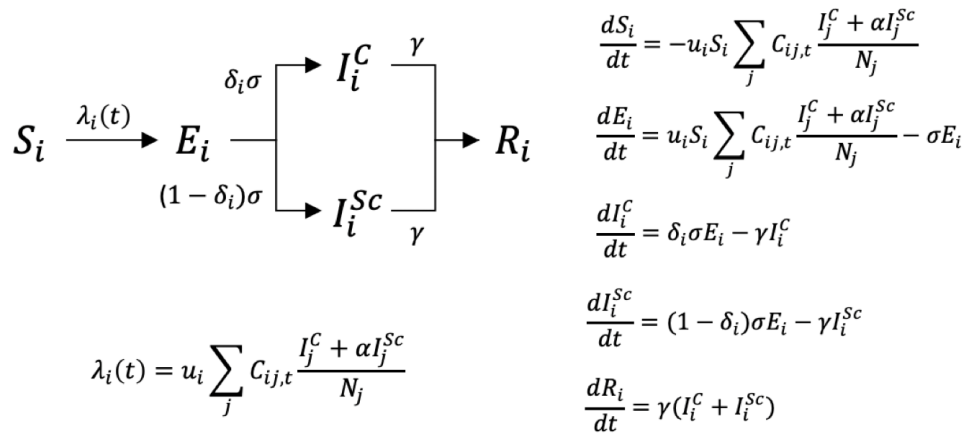

Figure 4: Age-structured SEIR model structure and corresponding equations representing susceptible ( $S_i$ ), exposed but not yet infectious, ( $E_i$ ), clinical infectious ( $I_i^C$ ), subclinical infectious ( $I_i^{Sc}$ ), and recovered individuals ( $R_i$ ). Age groups [0,18), [18,25), [25,35), [35,45), [45,65), [65,100] are denoted by the index  $i$ ,  $u_i$  is the age-dependent probability of infection given contact with an infectious individual,  $C_{ij,t}$  is the time-varying number of individuals in age group  $j$  contacted by an individual in age group  $i$  per day at time  $t$ ,  $\alpha$  is the multiplicative factor by which the probability of infection is reduced for subclinical infections,  $\delta_i$  is the age-dependent probability of being clinically infectious,  $\sigma$  is the inverse of the latent period, and  $\gamma$  is the recovery rate.

### 250 Simulation Conditions

251 Simulations start two weeks prior to the first reported case in each DMA and run to the last date of the Wave 5  
 252 BICS survey, February 15, 2021. This assumption for the starting date, which attempts to account for delays in the  
 253 reporting of the initial cases of COVID-19 in the US, results in a starting date across the six DMAs that ranges from  
 254 the start of February to mid-February. This date range is consistent with estimated introduction times for SARS-

255 CoV-2 in the U.S. (Jordan et al., 2020). To initialize the outbreaks, each DMA starts with the same proportion  
256 of the population ( $p_0 = 0.0001$ ) exposed or infected, which is evenly spread across age groups in the exposed ( $E_i$ ),  
257 clinical infectious ( $I_i^C$ ), and subclinical infectious ( $I_i^{Sc}$ ) compartments. The number of susceptible people in each  
258 age group at the start of the simulation, ( $S_i$ ), is therefore the number of people in age group in the city based  
259 on ACS demographic data, minus the number of people starting in the exposed, clinical infectious, and subclinical  
260 infectious compartments. All population values are from the 1-year extract of the 2018 American Community Survey  
261 provided by IPUMS (Ruggles et al., 2021). Our model results are robust to starting simulations with different initial  
262 proportions exposed or infected, as shown in sensitivity analyses (Supplementary Figure S11).

263 The age-structured contact matrices for each DMA and wave from BICS were used as the time-varying contact  
264 matrices in the SEIR models. Contact matrices from each BICS wave were used during the period in which the  
265 survey wave was conducted. We linearly interpolated average reported contacts for each cell of the contact matrices  
266 between survey waves to obtain the daily contact matrices  $C_{ij,t}$ . Since the Philadelphia DMA was added in Wave  
267 1, we used the Wave 0 national age-structured contact matrix as Wave 0 for contact rates in Philadelphia (Feehan  
268 & Mahmud, 2021). The BICS Wave 0 captures contact rates starting mid-March, when social distancing mandates  
269 were already enforced. To capture pre-pandemic baseline contact rates we used the model-based synthetic contact  
270 matrix estimated by Prem et al. (2021) for the US (Prem et al., 2021). Since the synthetic contact matrix from Prem  
271 et al. (2021) is available in 5-year age bands, to align the youngest age group, we assumed that the 15-17 year olds  
272 in the Prem et al. (2021) study have the same contact rates on average as 0-14 year olds.

To examine simulation results in the absence of empirical estimates from BICS, we also ran simulations that  
were parameterized using the same simulation conditions with one exception: the contact matrices were synthetic  
age-structured contact rates for the US from the literature (Prem et al., 2021). For each BICS wave, we calculated  
the ratio of the dominant eigenvalue of the DMA-specific BICS contact matrix and the dominant eigenvalue of the  
Prem et al. (2021) US matrix, representing pre-pandemic contact rates. The estimated ratio from this calculation  
represents a factor by which to scale the pre-pandemic contact rate estimates to capture changing contact rates over  
the course of the pandemic. We multiplied the synthetic US contact matrix from Prem et al. (2021) by these scaling  
factors to obtain the contact rates,  $C_{ij,w}^s$  in these simulations:

$$C_{ij,w}^s = \frac{\rho_{B_{w,d}}}{\rho_R} * R_{ij} \quad (4)$$

273 where  $\rho_{B_{w,d}}$  is the dominant eigenvalue of the DMA-specific ( $d$ ) and wave-specific ( $w$ ) BICS contact matrix,  $\rho_R$  is  
274 the dominant eigenvalue of the Prem et al. (2021) US contact matrix, and  $R_{ij}$  is the US contact matrix from Prem  
275 et al. (2021). We interpolated between survey waves to obtain daily contact matrices  $C_{ij,t}^s$ .

## 276 Calibration to Target $R_0$ Estimates

277 The age-dependent probabilities of infection given contact with an infectious individual,  $u_i$ , were scaled by calibrating  
278 to target  $R_0$  estimates. First, we estimated the daily effective reproductive number,  $R_t$ , for each DMA using the  
279 method developed by Wallinga and Teunis (2004) (Wallinga & Teunis, 2004), which is a likelihood-based method  
280 that considers pairs of cases and uses the distribution of the serial interval (i.e. the time interval between successive  
281 cases in a transmission chain) and a time series of incident cases. We assumed a serial interval with mean 3.96 days  
282 and standard deviation of 4.75 days (Du et al., 2020). We also used an alternate method (Cori, Ferguson, Fraser, &  
283 Cauchemez, 2013) for estimating  $R_t$  as a sensitivity analysis, although the two estimation methods are expected to  
284 yield similar results for our purposes of estimating only early  $R_t$  values in a retrospective manner (Gostic et al., 2020).  
285 Our target estimates of  $R_0$  for each DMA are the maximum mean value estimated from the Wallinga and Teunis  
286 (2004) and Cori et. al. (2013) methods in the first week of estimates. Lastly, we multiplied the next-generation  
287 matrix (NGM) by a constant to achieve the target dominant eigenvalue, which is  $R_0$ . Using methods previously  
288 described to derive an expression for the NGM (Diekmann, Heesterbeek, & Roberts, 2010), we defined the NGM as  
289 the following:

$$NGM_{ij} = u_i C_{ij} [\delta_i + (1 - \delta_i) \alpha] \quad (5)$$

where  $u_i$  is a vector of the age-group-specific probabilities of infection given contact with an infectious individual,  $C_{ij}$  is the number of individuals in age group  $j$  contacted by an individual in age group  $i$  based on the Prem et al. (2021) US contact matrix, representing estimates of pre-pandemic contact rates,  $\delta_i$  is the age-dependent probability of being clinically infectious, and  $\alpha$  is the multiplicative factor by which the probability infection is reduced for subclinical infections.

## Parameter Uncertainty

To incorporate parameter uncertainty, we drew 1,000 values of  $R_0$  for each DMA from a truncated normal distribution, with the mean estimated from the  $R_0$  estimation procedures (Atlanta = 2.4; Bay Area = 2.1; Boston = 2.9; New York City = 3.2, Philadelphia = 2.4; Phoenix = 2.8), a standard deviation of 0.54, and a minimum possible value of 0.8. In a sensitivity analysis, we also varied the proportion of the population assumed to be latent or infectious at the start of the outbreak ( $p_0$ ) from 1/5 to 5 times  $p_0 = 0.0001$  (Supplementary Figure S11).

## Presentation of Results

In presenting our results, we calculated the incidence rate ratio (IRR) of infections for each BICS survey wave and DMA as the following:

$$IRR_{i,w,d} = \frac{Incidence_{i,w,d}/N_{i,d}}{Incidence_{[0,18],w,d}/N_{[0,18],d}} \quad (6)$$

where  $i$  references the age categories 18-34, 35-64, and 65+,  $w$  references the BICS survey wave,  $d$  references one of the six DMAs, *Incidence* refers to the simulated incidence on the midpoint date of each BICS survey wave, and  $N$  refers to the population size of the age group based on ACS data. IRR estimates shown in Figure 3A are based on simulated total incidence while estimates in Supplementary Figure S8 are based on simulated clinical incidence. We used [0,18) year olds as the reference age group. We collapsed the simulation results into four age categories for visual simplicity due to similar findings in certain age groups, but we show the simulations results for all six age categories in Supplementary Figures S6 and S7.

For New York City and Phoenix, we also compared the simulated proportion of clinical infections in each age group to the empirical proportion of COVID-19 infections in each age group. The New York City data are weekly data from the New York City Department of Health and Mental Hygiene (*Coronavirus Data*, 2021) on the proportions of positive COVID-19 molecular tests by age group. The data for Phoenix are weekly confirmed and probable COVID-19 cases by age group reported by the Maricopa County Public Health Department (*Dashboard: Weekly confirmed and probably COVID-19 cases over time by age group*, 2021). Since the youngest age group reported by the Maricopa County Public Health Department data source is [0,19), we treated this age category as [0,18) in order to align this youngest group with our simulation results for plotting purposes. Comparing age-specific simulated and empirical COVID-19 proportions was not possible for the other DMAs due to the lack of empirical data on age categories that are comparable to those in our simulations.

All analyses are conducted in R version 3.6.3.

## Author Contributions

Taylor Chin, Conceptualization, Methodology, Data Curation, Formal Analysis, Writing - Original Draft Preparation, Writing - Review & Editing; Dennis Feehan, Methodology, Data Curation, Writing - Review & Editing, Funding Acquisition; Caroline O. Buckee, Conceptualization, Writing - Review & Editing; Ayesha S. Mahmud, Conceptualization, Methodology, Data Curation, Writing - Review & Editing, Supervision, Funding Acquisition

## 327 **Data and Code Availability**

328 Data and code to reproduce all results and figures can be found at [https://github.com/taylor-chin/bics-age-model-](https://github.com/taylor-chin/bics-age-model-release)  
329 release.

## 330 **Acknowledgments**

331 The authors thank Inga Holmdahl and Rebecca Kahn for their helpful comments and feedback.

## 332 **Declaration of Interests**

333 None

## 334 **Funding Source**

335 Seed funding was provided by a Berkeley Population Center pilot grant (NICHD P2CHD073964) and further funding  
336 was provided by the Hellman Fellows Program.

## References

- 337
- 338 Aaron, R. (n.d.). *autumn: Fast, Modern, and Tidy Raking*. Retrieved from [https://github.com/](https://github.com/aaronrudkin/autumn)  
339 [aaronrudkin/autumn](https://github.com/aaronrudkin/autumn)
- 340 *Archive of COVID-19 cases in Massachusetts (COVID-19 Raw Data - March 22, 2021)*. (2021, March).  
341 Retrieved 2021-07-20, from [https://www.mass.gov/info-details/archive-of-covid-19-cases-in-](https://www.mass.gov/info-details/archive-of-covid-19-cases-in-massachusetts)  
342 [-massachusetts](https://www.mass.gov/info-details/archive-of-covid-19-cases-in-massachusetts)
- 343 Boehmer, T. K. (2020). Changing Age Distribution of the COVID-19 Pandemic in the United States,  
344 May–August 2020. *MMWR. Morbidity and Mortality Weekly Report*, *69*. Retrieved 2021-02-12,  
345 from <https://www.cdc.gov/mmwr/volumes/69/wr/mm6939e1.htm> doi: 10.15585/mmwr.mm6939e1
- 346 Bubar, K. M., Reinholt, K., Kissler, S. M., Lipsitch, M., Cobey, S., Grad, Y. H., & Larremore, D. B.  
347 (2021, January). Model-informed COVID-19 vaccine prioritization strategies by age and serostatus.  
348 *Science*. Retrieved 2021-02-13, from [https://science.sciencemag.org/content/early/2021/02/](https://science.sciencemag.org/content/early/2021/02/01/science.abe6959)  
349 [01/science.abe6959](https://science.sciencemag.org/content/early/2021/02/01/science.abe6959) (Publisher: American Association for the Advancement of Science Section:  
350 Research Article) doi: 10.1126/science.abe6959
- 351 Cevik, M., Kuppalli, K., Kindrachuk, J., & Peiris, M. (2020, October). Virology, transmission, and pathogen-  
352 esis of SARS-CoV-2. *BMJ*, *371*, m3862. Retrieved 2021-05-24, from [https://www.bmj.com/content/](https://www.bmj.com/content/371/bmj.m3862)  
353 [371/bmj.m3862](https://www.bmj.com/content/371/bmj.m3862) doi: 10.1136/bmj.m3862
- 354 Cori, A., Ferguson, N. M., Fraser, C., & Cauchemez, S. (2013, November). A New Framework and Software to  
355 Estimate Time-Varying Reproduction Numbers During Epidemics. *American Journal of Epidemiology*,  
356 *178*(9), 1505–1512. Retrieved 2021-02-13, from <https://doi.org/10.1093/aje/kwt133> doi: 10.1093/  
357 [aje/kwt133](https://doi.org/10.1093/aje/kwt133)
- 358 *Coronavirus Data*. (2021, June). NYC Department of Health and Mental Hygiene. Retrieved 2021-06-24,  
359 from <https://github.com/nychealth/coronavirus-data> (original-date: 2020-03-26T15:26:18Z)
- 360 *COVID-19 Cases Summarized by Age Group*. (2021, July). Retrieved 2021-07-20, from [https://data.sfgov](https://data.sfgov.org/COVID-19/COVID-19-Cases-Summarized-by-Age-Group/sunc-2t3k)  
361 [.org/COVID-19/COVID-19-Cases-Summarized-by-Age-Group/sunc-2t3k](https://data.sfgov.org/COVID-19/COVID-19-Cases-Summarized-by-Age-Group/sunc-2t3k)
- 362 *COVID-19 Status Report*. (2021, March). Retrieved 2021-07-20, from [https://dph.georgia.gov/covid](https://dph.georgia.gov/covid-19-daily-status-report)  
363 [-19-daily-status-report](https://dph.georgia.gov/covid-19-daily-status-report)
- 364 *Dashboard: Weekly confirmed and probably COVID-19 cases over time by age group*. (2021, June).  
365 Retrieved 2021-06-24, from [https://phdata.maricopa.gov/Dashboard/e10a16d8-921f-4aac-b921](https://phdata.maricopa.gov/Dashboard/e10a16d8-921f-4aac-b921-26d95e638a45?e=false&vo=viewonly)  
366 [-26d95e638a45?e=false&vo=viewonly](https://phdata.maricopa.gov/Dashboard/e10a16d8-921f-4aac-b921-26d95e638a45?e=false&vo=viewonly)
- 367 Davies, N. G., Klepac, P., Liu, Y., Prem, K., Jit, M., & Eggo, R. M. (2020, August). Age-dependent effects  
368 in the transmission and control of COVID-19 epidemics. *Nature Medicine*, *26*(8), 1205–1211. Retrieved  
369 2020-11-23, from <https://www.nature.com/articles/s41591-020-0962-9> (Number: 8 Publisher:  
370 Nature Publishing Group) doi: 10.1038/s41591-020-0962-9
- 371 Diekmann, O., Heesterbeek, J. A. P., & Roberts, M. G. (2010, June). The construction of next-generation  
372 matrices for compartmental epidemic models. *Journal of the Royal Society Interface*, *7*(47), 873–  
373 885. Retrieved 2021-07-07, from <https://www.ncbi.nlm.nih.gov/pmc/articles/PMC2871801/> doi:  
374 [10.1098/rsif.2009.0386](https://www.ncbi.nlm.nih.gov/pmc/articles/PMC2871801/)
- 375 Dorelien, A., Ramen, A., & Swanson, I. (2020, August). Analyzing the Demographic, Spatial, and Temporal  
376 Factors Influencing Social Contact Patterns in the U.S. and Implications for Infectious Disease Spread.  
377 doi: <https://doi.org/10.18128/MPC2020-05>
- 378 Dorelien, A. M., Simon, A., Hage, S., Call, K. T., Enns, E., & Kulasingam, S. (2020, August). Min-  
379 nesota Social Contacts and Mixing Patterns Survey with Implications for Modelling of Infectious

- 380 Disease Transmission and Control. *Survey Practice*, 13(1), 13669. Retrieved 2020-12-08, from  
381 [https://www.surveypractice.org/article/13669-minnesota-social-contacts-and-mixing](https://www.surveypractice.org/article/13669-minnesota-social-contacts-and-mixing-patterns-survey-with-implications-for-modelling-of-infectious-disease-transmission-and-control?auth_token=FL5ApnLKj0HDvQSfc12A)  
382 [-patterns-survey-with-implications-for-modelling-of-infectious-disease-transmission](https://www.surveypractice.org/article/13669-minnesota-social-contacts-and-mixing-patterns-survey-with-implications-for-modelling-of-infectious-disease-transmission-and-control?auth_token=FL5ApnLKj0HDvQSfc12A)  
383 [-and-control?auth\\_token=FL5ApnLKj0HDvQSfc12A](https://www.surveypractice.org/article/13669-minnesota-social-contacts-and-mixing-patterns-survey-with-implications-for-modelling-of-infectious-disease-transmission-and-control?auth_token=FL5ApnLKj0HDvQSfc12A) doi: 10.29115/SP-2020-0007
- 384 Du, Z., Xu, X., Wu, Y., Wang, L., Cowling, B. J., & Meyers, L. A. (2020, June). Serial Interval of COVID-  
385 19 among Publicly Reported Confirmed Cases - Volume 26, Number 6 - June 2020 - Emerging  
386 Infectious Diseases journal - CDC. *Emerging Infectious Diseases*, 26(6). Retrieved 2021-06-10, from  
387 [https://wwwnc.cdc.gov/eid/article/26/6/20-0357\\_article](https://wwwnc.cdc.gov/eid/article/26/6/20-0357_article) doi: 10.3201/eid2606.200357
- 388 Eames, K. T. D., Tilston, N. L., Brooks-Pollock, E., & Edmunds, W. J. (2012, March). Measured Dynamic  
389 Social Contact Patterns Explain the Spread of H1N1v Influenza. *PLOS Computational Biology*, 8(3),  
390 e1002425. Retrieved 2021-05-25, from [https://journals.plos.org/ploscompbiol/article?id=10](https://journals.plos.org/ploscompbiol/article?id=10.1371/journal.pcbi.1002425)  
391 [.1371/journal.pcbi.1002425](https://journals.plos.org/ploscompbiol/article?id=10.1371/journal.pcbi.1002425) (Publisher: Public Library of Science) doi: 10.1371/journal.pcbi  
392 [.1002425](https://journals.plos.org/ploscompbiol/article?id=10.1371/journal.pcbi.1002425)
- 393 Enns, E. A., Kirkeide, M., Mehta, A., MacLehose, R., Knowlton, G. S., Smith, M. K., ... Kulasingam, S.  
394 (2020, May). Modeling the Impact of Social Distancing Measures on the Spread of SARS-CoV-2 in  
395 Minnesota: Technical Documentation Version 3.0. Retrieved from [https://mn.gov/covid19/assets/](https://mn.gov/covid19/assets/MNmodel_TechnicalDoc_5.13.20_tcm1148-431812.pdf)  
396 [MNmodel\\_TechnicalDoc\\_5.13.20\\_tcm1148-431812.pdf](https://mn.gov/covid19/assets/MNmodel_TechnicalDoc_5.13.20_tcm1148-431812.pdf)
- 397 Feehan, D. M., & Mahmud, A. S. (2021, February). Quantifying population contact patterns in the United  
398 States during the COVID-19 pandemic. *Nature Communications*, 12(1), 893. Retrieved 2021-02-  
399 13, from <https://www.nature.com/articles/s41467-021-20990-2> (Number: 1 Publisher: Nature  
400 Publishing Group) doi: 10.1038/s41467-021-20990-2
- 401 Gostic, K. M., McGough, L., Baskerville, E. B., Abbott, S., Joshi, K., Tedijanto, C., ... Cobey, S. (2020,  
402 December). Practical considerations for measuring the effective reproductive number, Rt. *PLOS*  
403 *Computational Biology*, 16(12), e1008409. Retrieved 2021-02-13, from [https://journals.plos.org/](https://journals.plos.org/ploscompbiol/article?id=10.1371/journal.pcbi.1008409)  
404 [ploscompbiol/article?id=10.1371/journal.pcbi.1008409](https://journals.plos.org/ploscompbiol/article?id=10.1371/journal.pcbi.1008409) (Publisher: Public Library of Science)  
405 doi: 10.1371/journal.pcbi.1008409
- 406 Hay, J. A., Haw, D. J., Hanage, W. P., Metcalf, C. J. E., & Mina, M. J. (2020). Implications of the  
407 age profile of the novel coronavirus. Retrieved 2020-11-23, from [http://nrs.harvard.edu/urn-3:](http://nrs.harvard.edu/urn-3:HUL.InstRepos:42639493)  
408 [HUL.InstRepos:42639493](http://nrs.harvard.edu/urn-3:HUL.InstRepos:42639493)
- 409 Hoang, T., Coletti, P., Melegaro, A., Wallinga, J., Grijalva, C. G., Edmunds, J. W., ... Hens, N.  
410 (2019, September). A Systematic Review of Social Contact Surveys to Inform Transmission Mod-  
411 els of Close-contact Infections. *Epidemiology (Cambridge, Mass.)*, 30(5), 723-736. Retrieved  
412 2020-11-30, from <https://www.ncbi.nlm.nih.gov/pmc/articles/PMC6684224/> doi: 10.1097/EDE  
413 [.0000000000001047](https://www.ncbi.nlm.nih.gov/pmc/articles/PMC6684224/)
- 414 Holmdahl, I., Kahn, R., Hay, J., Buckee, C. O., & Mina, M. (2020, November). Frequent testing and  
415 immunity-based staffing will help mitigate outbreaks in nursing home settings. *medRxiv*. doi: [https://](https://doi.org/10.1101/2020.11.04.20224758)  
416 [doi.org/10.1101/2020.11.04.20224758](https://doi.org/10.1101/2020.11.04.20224758)
- 417 Jarvis, C. I., Van Zandvoort, K., Gimma, A., Prem, K., Auzenbergs, M., O'Reilly, K., ... CMMID  
418 COVID-19 working group (2020, May). Quantifying the impact of physical distance measures on  
419 the transmission of COVID-19 in the UK. *BMC Medicine*, 18(1), 124. Retrieved 2020-12-09, from  
420 <https://doi.org/10.1186/s12916-020-01597-8> doi: 10.1186/s12916-020-01597-8
- 421 Jorden, M. A., Rudman, S. L., Villarino, E., Hoferka, S., Patel, M. T., Bemis, K., ... Starita, L. M. (2020,  
422 June). Evidence for Limited Early Spread of COVID-19 Within the United States, January-February

- 423 ary 2020. *MMWR. Morbidity and Mortality Weekly Report*, 69(22), 680–684. Retrieved 2020-12-09,  
424 from <https://www.cdc.gov/mmwr/volumes/69/wr/mm6922e1.htm> doi: 10.15585/mmwr.mm6922e1
- 425 Klepac, P., Kucharski, A. J., Conlan, A. J., Kissler, S., Tang, M. L., Fry, H., & Gog, J. R. (2020, March).  
426 Contacts in context: large-scale setting-specific social mixing matrices from the BBC Pandemic project.  
427 *medRxiv*, 2020.02.16.20023754. Retrieved 2020-12-11, from [https://www.medrxiv.org/content/10](https://www.medrxiv.org/content/10.1101/2020.02.16.20023754v2)  
428 [.1101/2020.02.16.20023754v2](https://www.medrxiv.org/content/10.1101/2020.02.16.20023754v2) (Publisher: Cold Spring Harbor Laboratory Press) doi: 10.1101/  
429 2020.02.16.20023754
- 430 Kucharski, A. J., Kwok, K. O., Wei, V. W. I., Cowling, B. J., Read, J. M., Lessler, J., ... Riley, S.  
431 (2014, June). The Contribution of Social Behaviour to the Transmission of Influenza A in a Human  
432 Population. *PLOS Pathogens*, 10(6), e1004206. Retrieved 2021-05-25, from [https://journals.plos](https://journals.plos.org/plospathogens/article?id=10.1371/journal.ppat.1004206)  
433 [.org/plospathogens/article?id=10.1371/journal.ppat.1004206](https://journals.plos.org/plospathogens/article?id=10.1371/journal.ppat.1004206) (Publisher: Public Library of  
434 Science) doi: 10.1371/journal.ppat.1004206
- 435 Larremore, D. B., Wilder, B., Lester, E., Shehata, S., Burke, J. M., Hay, J. A., ... Parker, R. (2021,  
436 January). Test sensitivity is secondary to frequency and turnaround time for COVID-19 screening.  
437 *Science Advances*, 7(1), eabd5393. Retrieved 2021-02-13, from [https://advances.sciencemag.org/](https://advances.sciencemag.org/content/7/1/eabd5393)  
438 [content/7/1/eabd5393](https://advances.sciencemag.org/content/7/1/eabd5393) (Publisher: American Association for the Advancement of Science Section:  
439 Research Article) doi: 10.1126/sciadv.abd5393
- 440 McEvoy, D., McAloon, C. G., Collins, A. B., Hunt, K., Butler, F., Byrne, A. W., ... More, S. J. (2020,  
441 August). The relative infectiousness of asymptomatic SARS-CoV-2 infected persons compared with  
442 symptomatic individuals: A rapid scoping review. *medRxiv*, 2020.07.30.20165084. Retrieved 2021-02-  
443 13, from <https://www.medrxiv.org/content/10.1101/2020.07.30.20165084v1> (Publisher: Cold  
444 Spring Harbor Laboratory Press) doi: 10.1101/2020.07.30.20165084
- 445 Melegaro, A., Jit, M., Gay, N., Zaghenni, E., & Edmunds, W. J. (2011, September). What types of contacts  
446 are important for the spread of infections? Using contact survey data to explore European mixing  
447 patterns. *Epidemics*, 3(3), 143–151. Retrieved 2021-05-25, from [https://www.sciencedirect.com/](https://www.sciencedirect.com/science/article/pii/S1755436511000247)  
448 [science/article/pii/S1755436511000247](https://www.sciencedirect.com/science/article/pii/S1755436511000247) doi: 10.1016/j.epidem.2011.04.001
- 449 Miller, I. F., Becker, A. D., Grenfell, B. T., & Metcalf, C. J. E. (2020, August). Disease and healthcare  
450 burden of COVID-19 in the United States. *Nature Medicine*, 26(8), 1212–1217. Retrieved 2020-11-  
451 23, from <https://www.nature.com/articles/s41591-020-0952-y> (Number: 8 Publisher: Nature  
452 Publishing Group) doi: 10.1038/s41591-020-0952-y
- 453 Monod, M., Blenkinsop, A., Xi, X., Hebert, D., Bershan, S., Tietze, S., ... Team, o. b. o. t. I. C. C.-  
454 . R. (2021, February). Age groups that sustain resurging COVID-19 epidemics in the United States.  
455 *Science*. Retrieved 2021-02-12, from [https://science.sciencemag.org/content/early/2021/02/](https://science.sciencemag.org/content/early/2021/02/01/science.abe8372)  
456 [01/science.abe8372](https://science.sciencemag.org/content/early/2021/02/01/science.abe8372) (Publisher: American Association for the Advancement of Science Section:  
457 Research Article) doi: 10.1126/science.abe8372
- 458 Mossong, J., Hens, N., Jit, M., Beutels, P., Auranen, K., Mikolajczyk, R., ... Edmunds, W. J. (2008, March).  
459 Social Contacts and Mixing Patterns Relevant to the Spread of Infectious Diseases. *PLOS Medicine*,  
460 5(3), e74. Retrieved 2020-11-23, from [https://journals.plos.org/plosmedicine/article?id=10](https://journals.plos.org/plosmedicine/article?id=10.1371/journal.pmed.0050074)  
461 [.1371/journal.pmed.0050074](https://journals.plos.org/plosmedicine/article?id=10.1371/journal.pmed.0050074) (Publisher: Public Library of Science) doi: 10.1371/journal.pmed  
462 .0050074
- 463 Prem, K., Cook, A. R., & Jit, M. (2017, September). Projecting social contact matrices in 152 countries  
464 using contact surveys and demographic data. *PLOS Computational Biology*, 13(9), e1005697. Retrieved  
465 2021-02-10, from <https://journals.plos.org/ploscompbiol/article?id=10.1371/journal.pcbi>

- 466 .1005697 (Publisher: Public Library of Science) doi: 10.1371/journal.pcbi.1005697
- 467 Prem, K., Liu, Y., Russell, T. W., Kucharski, A. J., Eggo, R. M., Davies, N., ... Klepac, P. (2020, May).  
468 The effect of control strategies to reduce social mixing on outcomes of the COVID-19 epidemic in  
469 Wuhan, China: a modelling study. *The Lancet Public Health*, 5(5), e261–e270. Retrieved 2021-02-13,  
470 from <https://www.sciencedirect.com/science/article/pii/S2468266720300736> doi: 10.1016/  
471 S2468-2667(20)30073-6
- 472 Prem, K., Zandvoort, K. v., Klepac, P., Eggo, R. M., Davies, N. G., Group, C. f. t. M. M. o. I. D. C.-  
473 . W., ... Jit, M. (2021, July). Projecting contact matrices in 177 geographical regions: An update  
474 and comparison with empirical data for the COVID-19 era. *PLOS Computational Biology*, 17(7),  
475 e1009098. Retrieved 2021-09-23, from [https://journals.plos.org/ploscompbiol/article?id=10](https://journals.plos.org/ploscompbiol/article?id=10.1371/journal.pcbi.1009098)  
476 .1371/journal.pcbi.1009098 (Publisher: Public Library of Science) doi: 10.1371/journal.pcbi  
477 .1009098
- 478 Rohani, P., Zhong, X., & King, A. A. (2010, November). Contact Network Structure Explains the Changing  
479 Epidemiology of Pertussis. *Science*, 330(6006), 982–985. Retrieved 2021-05-25, from [https://science](https://science.sciencemag.org/content/330/6006/982)  
480 .sciencemag.org/content/330/6006/982 (Publisher: American Association for the Advancement  
481 of Science Section: Report) doi: 10.1126/science.1194134
- 482 Rossell, H. (n.d.). *leafpeep*. Retrieved from <https://github.com/rossellhayes/leafpeep>
- 483 Ruggles, S., Flood, S., Goeken, R., Grover, J., Meyer, E., Pacas, J., & Sobek, M. (2021, February). *IPUMS*  
484 *USA: Version 10.0* [Text]. Retrieved 2021-06-24, from <https://doi.org/10.18128/D010.V10.0>  
485 *Testing data (Trends, Infections by Age)*. (2021, March). Retrieved 2021-07-20, from [https://www.phila](https://www.phila.gov/programs/coronavirus-disease-2019-covid-19/data/testing/)  
486 .gov/programs/coronavirus-disease-2019-covid-19/data/testing/
- 487 Wallinga, J., & Teunis, P. (2004, September). Different Epidemic Curves for Severe Acute Respiratory  
488 Syndrome Reveal Similar Impacts of Control Measures. *American Journal of Epidemiology*, 160(6),  
489 509–516. Retrieved 2020-12-10, from <https://academic.oup.com/aje/article/160/6/509/79472>  
490 (Publisher: Oxford Academic) doi: 10.1093/aje/kwh255
- 491 Zagheni, E., Billari, F. C., Manfredi, P., Melegaro, A., Mossong, J., & Edmunds, W. J. (2008, Novem-  
492 ber). Using Time-Use Data to Parameterize Models for the Spread of Close-Contact Infectious  
493 Diseases. *American Journal of Epidemiology*, 168(9), 1082–1090. Retrieved 2020-12-11, from  
494 <https://academic.oup.com/aje/article/168/9/1082/143294> (Publisher: Oxford Academic) doi:  
495 10.1093/aje/kwn220



## 496 Supplementary Material

|                        | <b>Wave 0</b> | <b>Wave 1</b> | <b>Wave 2</b> | <b>Wave 3</b> | <b>Wave 4</b> | <b>Wave 5</b> | <b>Total</b>  |
|------------------------|---------------|---------------|---------------|---------------|---------------|---------------|---------------|
| <b>National sample</b> |               |               |               |               |               |               |               |
| National               | 644           | 1,392         | 1,127         | 1,514         | 1,113         | 1,317         | 7,107         |
| <b>City samples</b>    |               |               |               |               |               |               |               |
| Atlanta                | 210           | 203           | 215           | 288           | 309           | 258           | 1,483         |
| Bay Area               | 133           | 206           | 225           | 256           | 301           | 280           | 1,401         |
| Boston                 | 158           | 199           | 212           | 297           | 306           | 261           | 1,433         |
| New York City          | 150           | 213           | 224           | 314           | 329           | 310           | 1,540         |
| Philadelphia           | 0             | 219           | 216           | 288           | 333           | 283           | 1,339         |
| Phoenix                | 142           | 195           | 212           | 291           | 302           | 267           | 1,409         |
| <b>Full sample</b>     |               |               |               |               |               |               |               |
| <b>Full sample</b>     | <b>1,437</b>  | <b>2,627</b>  | <b>2,431</b>  | <b>3,248</b>  | <b>2,993</b>  | <b>2,976</b>  | <b>15,712</b> |

Table S1: Survey sample size by BICS survey wave and DMA

It is made available under a [CC-BY-NC-ND 4.0 International license](https://creativecommons.org/licenses/by-nc-nd/4.0/) .

|                                 | <b>Overall, N =<br/>15,712</b> | <b>National, N =<br/>7,107</b> | <b>Atlanta, N =<br/>1,483</b> | <b>Bay Area, N =<br/>1,401</b> | <b>Boston, N =<br/>1,433</b> | <b>NY, N =<br/>1,540</b> | <b>Philadelphia, N =<br/>1,339</b> | <b>Phoenix, N =<br/>1,409</b> |
|---------------------------------|--------------------------------|--------------------------------|-------------------------------|--------------------------------|------------------------------|--------------------------|------------------------------------|-------------------------------|
| <b>Gender</b>                   |                                |                                |                               |                                |                              |                          |                                    |                               |
| <b>Female</b>                   | 8,094 (52%)                    | 3,577 (50%)                    | 776 (52%)                     | 695 (50%)                      | 765 (53%)                    | 760 (49%)                | 743 (55%)                          | 778 (55%)                     |
| <b>Male</b>                     | 7,618 (48%)                    | 3,530 (50%)                    | 707 (48%)                     | 706 (50%)                      | 668 (47%)                    | 780 (51%)                | 596 (45%)                          | 631 (45%)                     |
| <b>Age</b>                      |                                |                                |                               |                                |                              |                          |                                    |                               |
| <b>[18,25)</b>                  | 2,067 (13%)                    | 928 (13%)                      | 207 (14%)                     | 176 (13%)                      | 190 (13%)                    | 206 (13%)                | 176 (13%)                          | 184 (13%)                     |
| <b>[25,35)</b>                  | 2,847 (18%)                    | 1,301 (18%)                    | 263 (18%)                     | 256 (18%)                      | 315 (22%)                    | 234 (15%)                | 226 (17%)                          | 252 (18%)                     |
| <b>[35,45)</b>                  | 3,711 (24%)                    | 1,663 (23%)                    | 390 (26%)                     | 337 (24%)                      | 309 (22%)                    | 417 (27%)                | 300 (22%)                          | 295 (21%)                     |
| <b>[45,65)</b>                  | 4,795 (31%)                    | 2,146 (30%)                    | 458 (31%)                     | 400 (29%)                      | 400 (28%)                    | 487 (32%)                | 450 (34%)                          | 454 (32%)                     |
| <b>[65,100]</b>                 | 2,292 (15%)                    | 1,069 (15%)                    | 165 (11%)                     | 232 (17%)                      | 219 (15%)                    | 196 (13%)                | 187 (14%)                          | 224 (16%)                     |
| <b>Urban/Rural</b>              |                                |                                |                               |                                |                              |                          |                                    |                               |
| <b>Urban</b>                    | 6,403 (41%)                    | 2,589 (37%)                    | 416 (28%)                     | 907 (65%)                      | 212 (15%)                    | 912 (60%)                | 254 (19%)                          | 1,113 (87%)                   |
| <b>Suburban</b>                 | 7,945 (51%)                    | 3,612 (51%)                    | 950 (64%)                     | 461 (33%)                      | 1,126 (80%)                  | 601 (39%)                | 1,077 (81%)                        | 118 (9.3%)                    |
| <b>Rural</b>                    | 1,126 (7.3%)                   | 857 (12%)                      | 116 (7.8%)                    | 27 (1.9%)                      | 70 (5.0%)                    | 12 (0.8%)                | 0 (0%)                             | 44 (3.5%)                     |
| <b>Wave</b>                     |                                |                                |                               |                                |                              |                          |                                    |                               |
| <b>Wave 0</b>                   | 1,437 (9.1%)                   | 644 (9.1%)                     | 210 (14%)                     | 133 (9.5%)                     | 158 (11%)                    | 150 (9.7%)               | 0 (0%)                             | 142 (10%)                     |
| <b>Wave 1</b>                   | 2,627 (17%)                    | 1,392 (20%)                    | 203 (14%)                     | 206 (15%)                      | 199 (14%)                    | 213 (14%)                | 219 (16%)                          | 195 (14%)                     |
| <b>Wave 2</b>                   | 2,431 (15%)                    | 1,127 (16%)                    | 215 (14%)                     | 225 (16%)                      | 212 (15%)                    | 224 (15%)                | 216 (16%)                          | 212 (15%)                     |
| <b>Wave 3</b>                   | 3,248 (21%)                    | 1,514 (21%)                    | 288 (19%)                     | 256 (18%)                      | 297 (21%)                    | 314 (20%)                | 288 (22%)                          | 291 (21%)                     |
| <b>Wave 4</b>                   | 2,993 (19%)                    | 1,113 (16%)                    | 309 (21%)                     | 301 (21%)                      | 306 (21%)                    | 329 (21%)                | 333 (25%)                          | 302 (21%)                     |
| <b>Wave 5</b>                   | 2,976 (19%)                    | 1,317 (19%)                    | 258 (17%)                     | 280 (20%)                      | 261 (18%)                    | 310 (20%)                | 283 (21%)                          | 267 (19%)                     |
| <b>Ethnicity</b>                |                                |                                |                               |                                |                              |                          |                                    |                               |
| <b>White</b>                    | 11,569 (74%)                   | 5,171 (73%)                    | 1,082 (73%)                   | 1,014 (72%)                    | 1,068 (75%)                  | 1,129 (73%)              | 1,027 (77%)                        | 1,078 (77%)                   |
| <b>Black</b>                    | 1,701 (11%)                    | 829 (12%)                      | 194 (13%)                     | 125 (8.9%)                     | 129 (9.0%)                   | 166 (11%)                | 159 (12%)                          | 99 (7.0%)                     |
| <b>Other</b>                    | 2,442 (16%)                    | 1,107 (16%)                    | 207 (14%)                     | 262 (19%)                      | 236 (16%)                    | 245 (16%)                | 153 (11%)                          | 232 (16%)                     |
| <b>Hispanic</b>                 | 1,482 (9.6%)                   | 660 (9.4%)                     | 133 (9.2%)                    | 137 (9.9%)                     | 108 (7.8%)                   | 161 (11%)                | 93 (7.1%)                          | 190 (14%)                     |
| <b>Education</b>                |                                |                                |                               |                                |                              |                          |                                    |                               |
| <b>College graduate</b>         | 7,788 (50%)                    | 3,176 (45%)                    | 785 (53%)                     | 883 (63%)                      | 775 (54%)                    | 934 (61%)                | 637 (48%)                          | 598 (43%)                     |
| <b>Some college</b>             | 4,546 (29%)                    | 2,220 (31%)                    | 368 (25%)                     | 349 (25%)                      | 368 (26%)                    | 351 (23%)                | 387 (29%)                          | 503 (36%)                     |
| <b>High school graduate</b>     | 2,370 (15%)                    | 1,140 (16%)                    | 244 (17%)                     | 124 (8.9%)                     | 217 (15%)                    | 192 (13%)                | 235 (18%)                          | 218 (16%)                     |
| <b>Non-high school graduate</b> | 935 (6.0%)                     | 533 (7.5%)                     | 71 (4.8%)                     | 44 (3.1%)                      | 69 (4.8%)                    | 58 (3.8%)                | 77 (5.8%)                          | 83 (5.9%)                     |
| <b>Household Size</b>           | 3.00 (2.00, 4.00)              | 3.00 (2.00, 4.00)              | 3.00 (2.00, 4.00)             | 3.00 (2.00, 4.00)              | 2.00 (2.00, 4.00)            | 3.00 (2.00, 4.00)        | 3.00 (2.00, 4.00)                  | 2.00 (2.00, 4.00)             |
| <b>Weekday</b>                  | 11,191 (71%)                   | 5,455 (77%)                    | 885 (60%)                     | 992 (71%)                      | 882 (62%)                    | 1,058 (69%)              | 932 (70%)                          | 987 (70%)                     |

<sup>1</sup> n (%); Median (IQR)

Table S2: Characteristics of BICS survey respondents (unweighted)

| Parameter                                                                 | Value                                | Source                                                                |
|---------------------------------------------------------------------------|--------------------------------------|-----------------------------------------------------------------------|
| Time-varying contact rate between age group $i$ and $j$ , $C_{ij,t}$      | Estimated for each city              | Berkeley Interpersonal Contact Survey (BICS)                          |
| Relative infectiousness of subclinical vs. clinical individuals, $\alpha$ | 0.5                                  | Assumption, in line with the range presented in (McEvoy et al., 2020) |
| Mean latent period, $1/\sigma$                                            | 3 days                               | (Davies et al., 2020)                                                 |
| Mean infectiousness period, $1/\gamma$                                    | 6 days                               | (Holmdahl, Kahn, Hay, Buckee, & Mina, 2020)                           |
| Probability of having clinical symptoms per age group, $\delta_i$         | [0.26, 0.24, 0.30, 0.36, 0.48, 0.69] | (Davies et al., 2020)                                                 |
| Susceptibility to infection per age group, $u_i$                          | [0.39, 0.62, 0.81, 0.83, 0.81, 0.74] | (Davies et al., 2020)                                                 |

Table S3: Parameters used in SEIR model

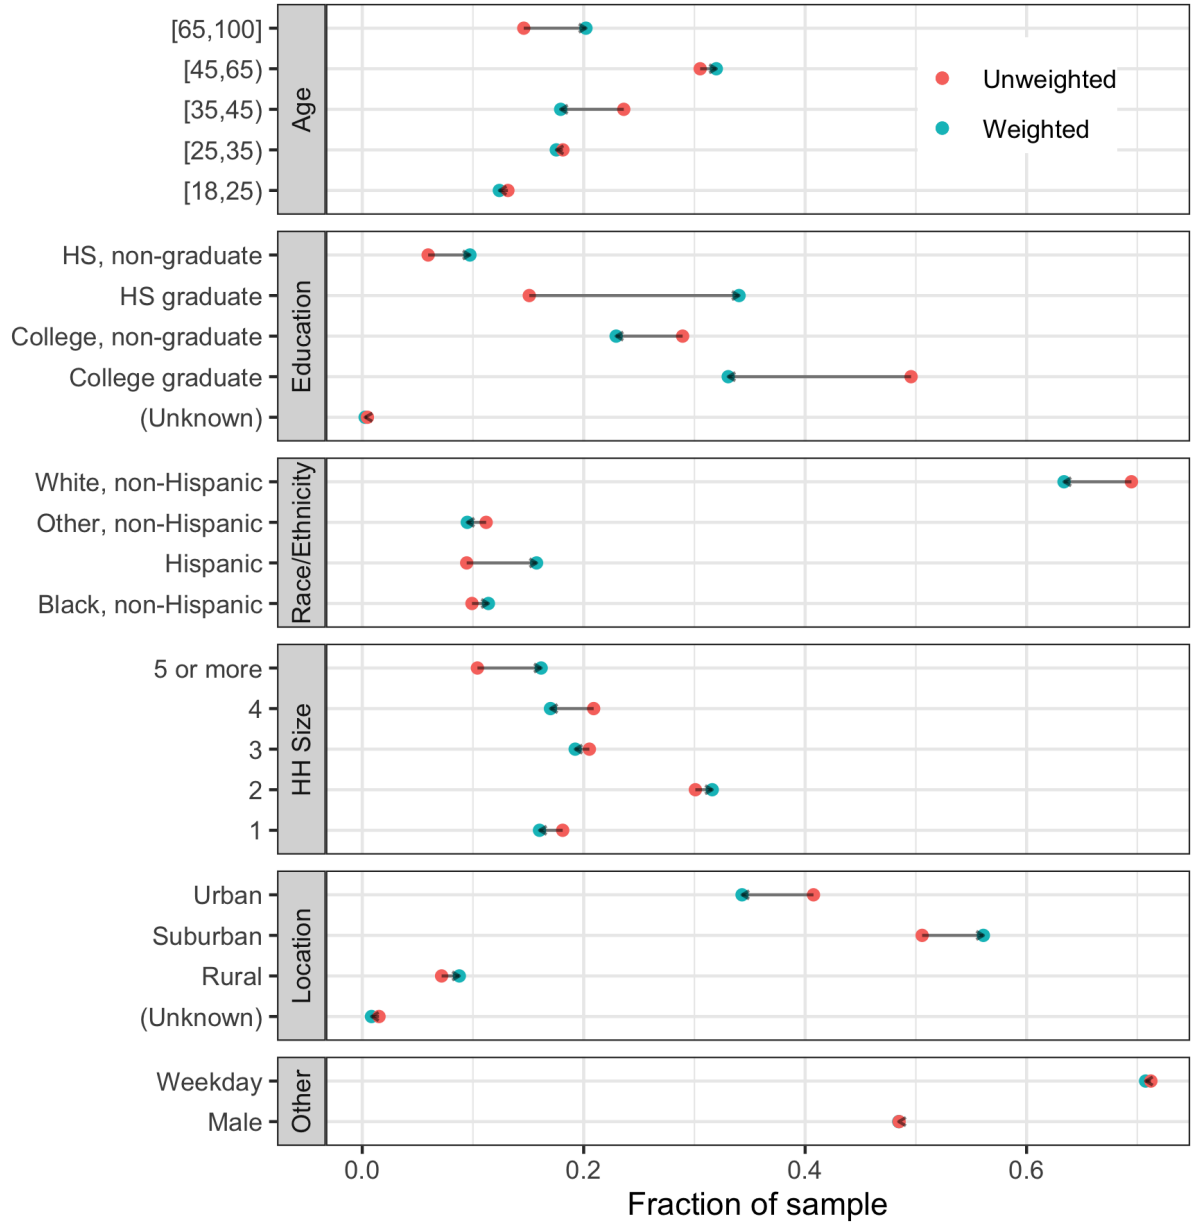

Figure S1: Characteristics of BICS survey respondents when weighted vs. unweighted. We used calibration weights to improve the representativeness of our sample. Each facet shows the unweighted (red) and calibration weighted (blue) composition of survey respondents for a given covariate.

It is made available under a [CC-BY-NC-ND 4.0 International license](https://creativecommons.org/licenses/by-nc-nd/4.0/).

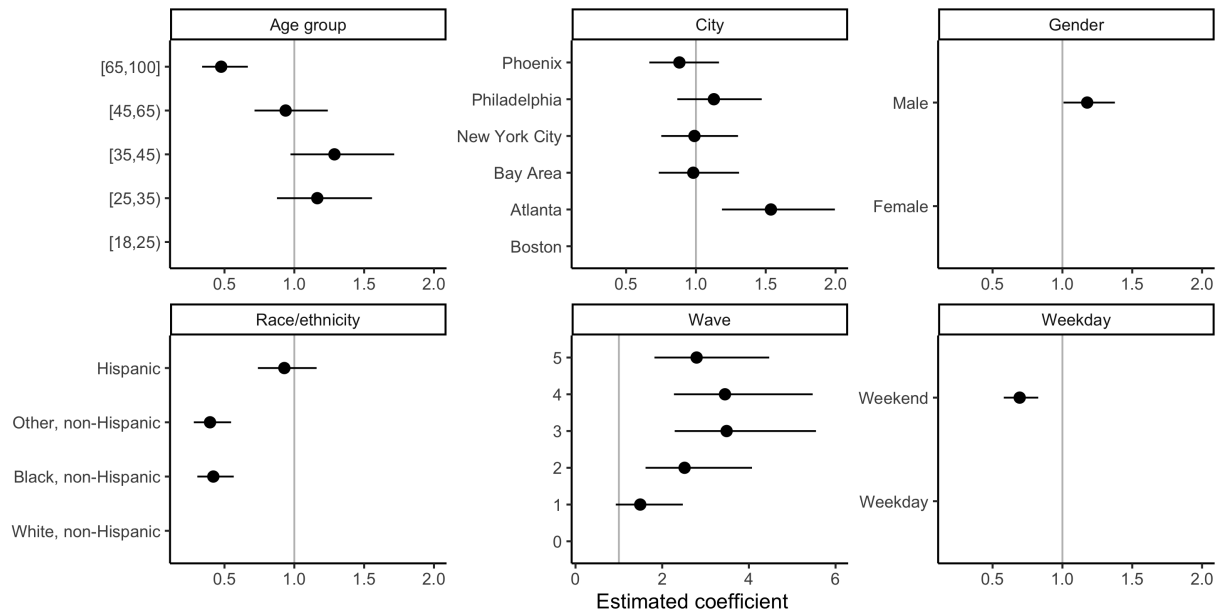

Figure S2: Estimated exponentiated coefficients from the logistic regression, where the outcome is the odds of reporting  $>7$  contacts, representing the 80th percentile in the BICS data.

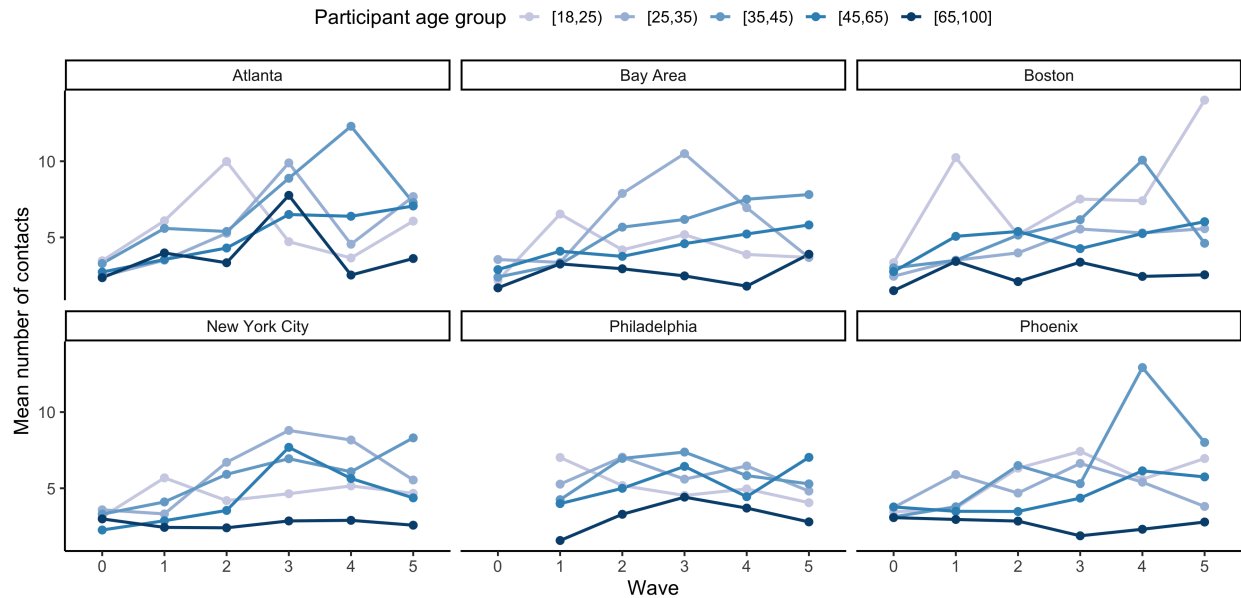

Figure S3: The mean number of contacts reported by BICS participants aged 18-24, 25-34, 35-44, 45-64, and 65+ years old during survey Waves 0-5 in each DMA of the BICS study.

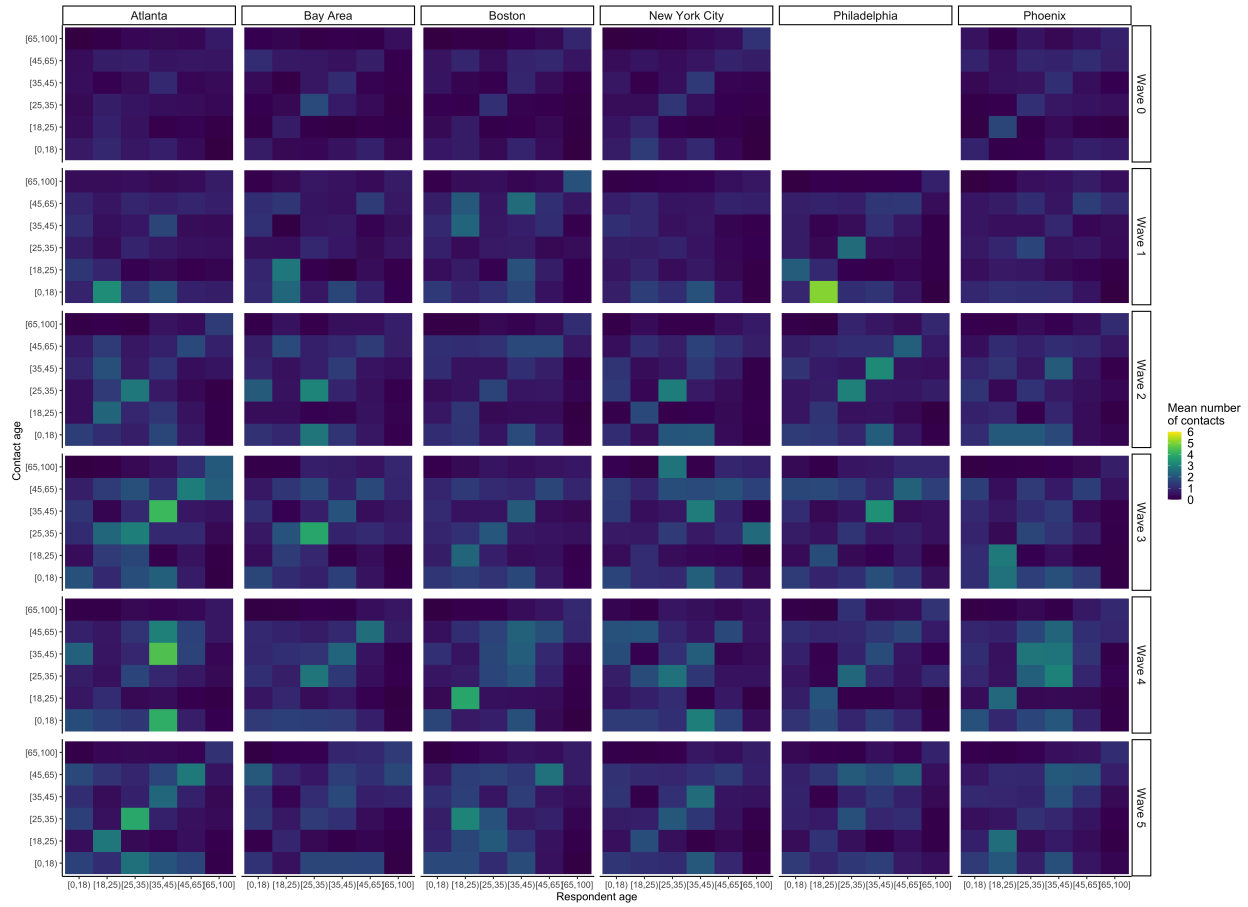

Figure S4: Estimated age-structured contact matrices for all contacts reported in each survey wave and DMA from the BICS.

It is made available under a [CC-BY-NC-ND 4.0 International license](https://creativecommons.org/licenses/by-nc-nd/4.0/).

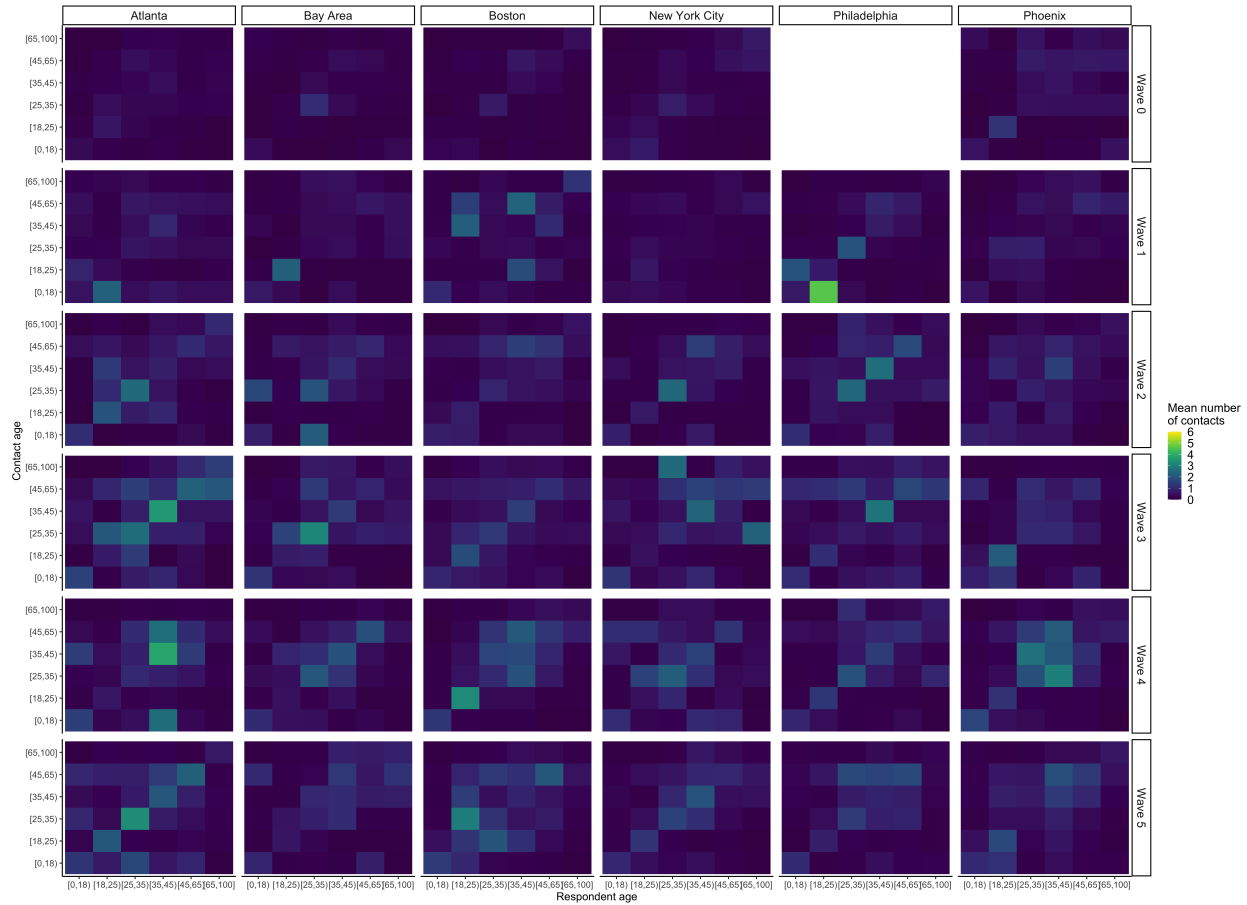

Figure S5: Estimated age-structured contact matrices for non-household contacts reported in each survey wave and DMA from the BICS.

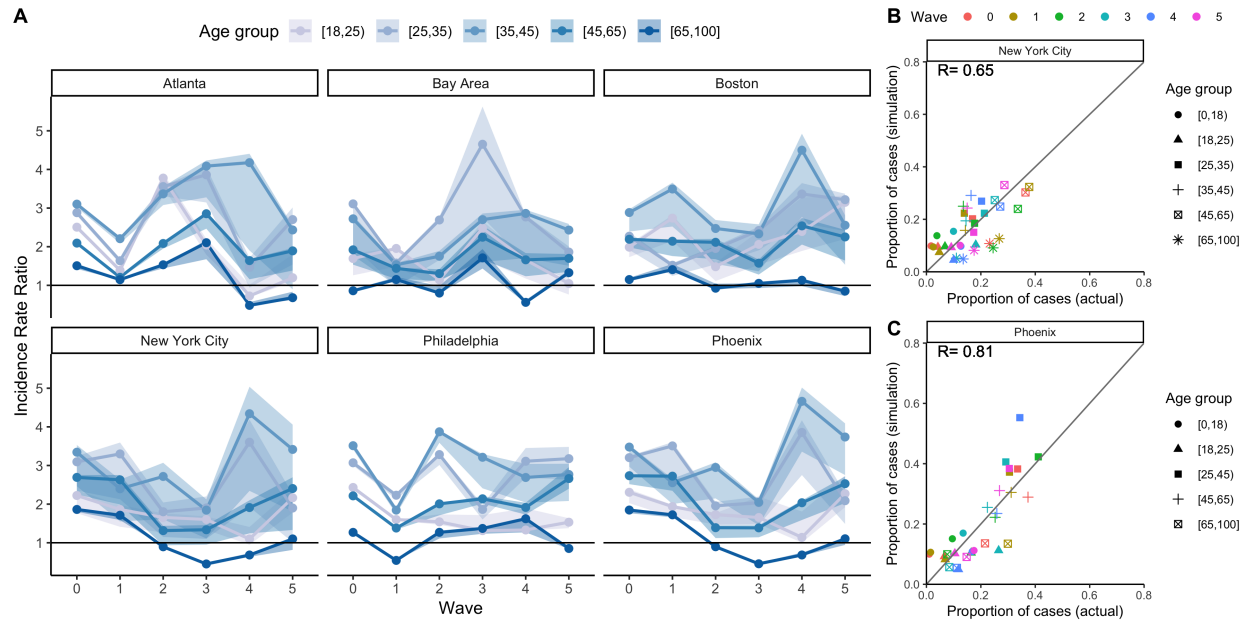

Figure S6: Mechanistic model results of total incidence for six age groups using BICS contact rate data, with comparisons to observed data where possible. Simulated incidence rate ratio (IRR) using total incidence for each DMA and BICS survey wave comparing 18-24, 25-34, 35-44, 45-64, and 65+ year olds to the reference age group of 0-17 year olds. 90% uncertainty bounds are estimated from running 1,000 simulations with 1,000 different values of  $R_0$ . The mathematical model is parameterized using empirical contact rate estimates from the BICS study. B) Scatterplot comparing the proportion of COVID-19 cases in each age group (represented by symbol shape) and survey wave (represented by symbol color) estimated in the simulation vs. reported in actual epidemiological data for New York City. The empirical data for New York City represent the proportion of positive COVID-19 molecular tests by age group for New York City). C) Scatterplot comparing the proportion of COVID-19 cases in each age group (represented by symbol shape) and survey wave (represented by symbol color) estimated in the simulation vs. reported in actual epidemiological data for Phoenix. The empirical data for Phoenix represent the proportion of confirmed and probable COVID-19 cases reported in Maricopa County.



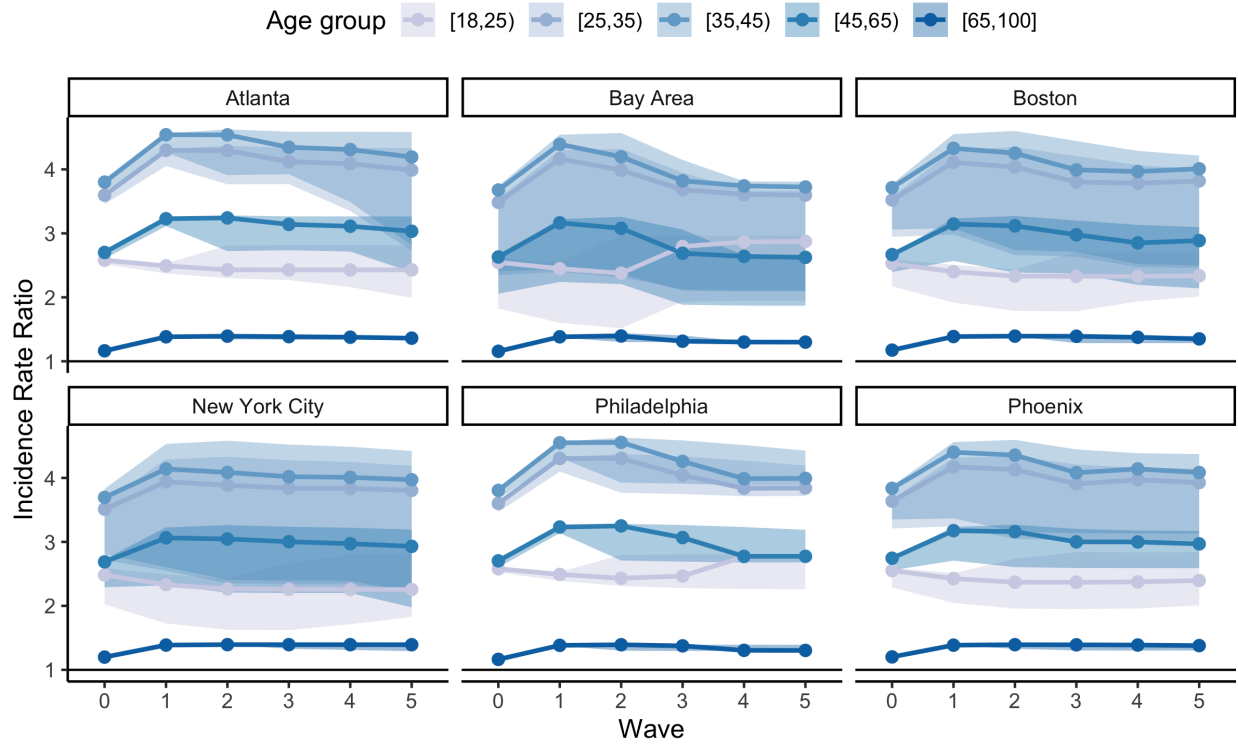

Figure S7: Mechanistic model results of total incidence for six age groups using alternative contact rate data. Simulated incidence rate ratio (IRR) using total incidence for each DMA and BICS survey wave comparing 18-24, 25-34, 35-44, 45-64, and 65+ year olds to the reference age group of 0-17 year olds. 90% uncertainty bounds are estimated from running 1,000 simulations with 1,000 different values of  $R_0$ . The mathematical model is parameterized using pre-pandemic synthetic contact rate estimates that have been scaled at each BICS survey wave using information from the BICS study.

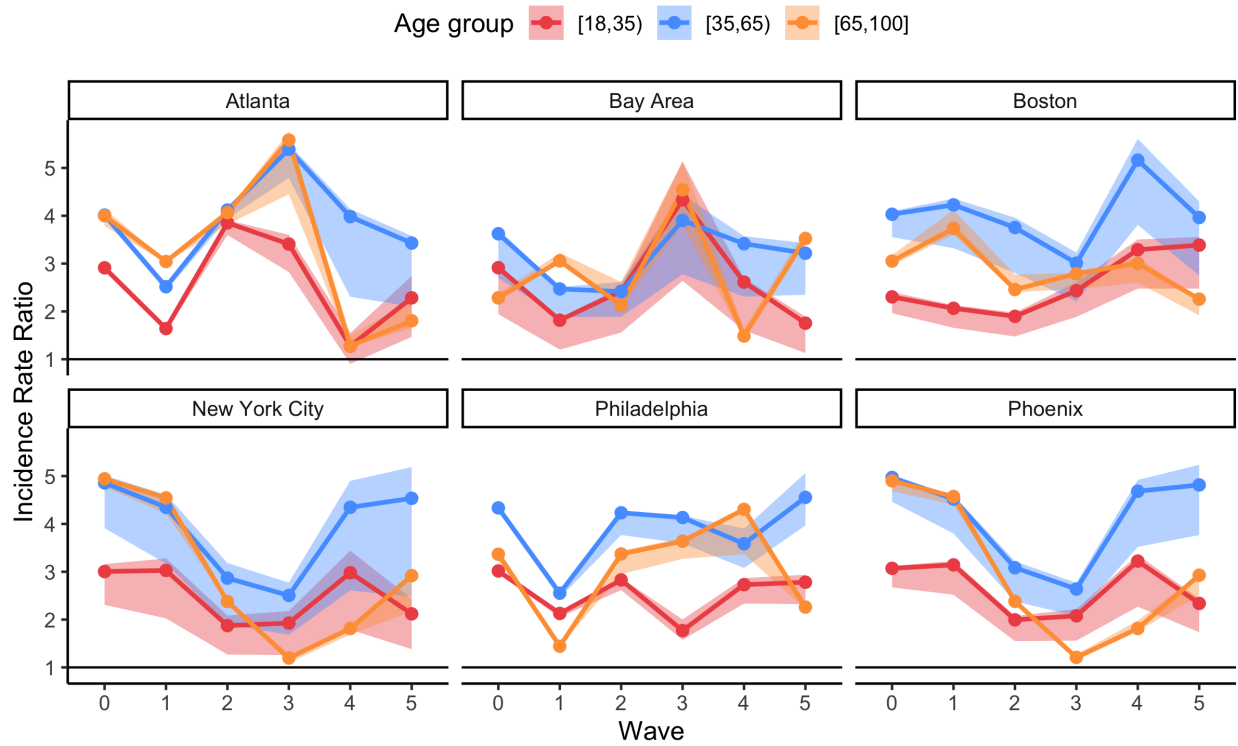

Figure S8: Mechanistic model results of clinical incidence for four age groups using BICS contact rate data. A) Simulated incidence rate ratio (IRR) using clinical incidence for each DMA and BICS survey wave comparing 18-34, 35-64, and 65+ year olds to the reference age group of 0-17 year olds.. 90% uncertainty bounds are estimated from running 1,000 simulations with 1,000 different values of  $R_0$ . The mathematical model is parameterized using empirical contact rate estimates from the BICS study.

It is made available under a [CC-BY-NC-ND 4.0 International license](https://creativecommons.org/licenses/by-nc-nd/4.0/).

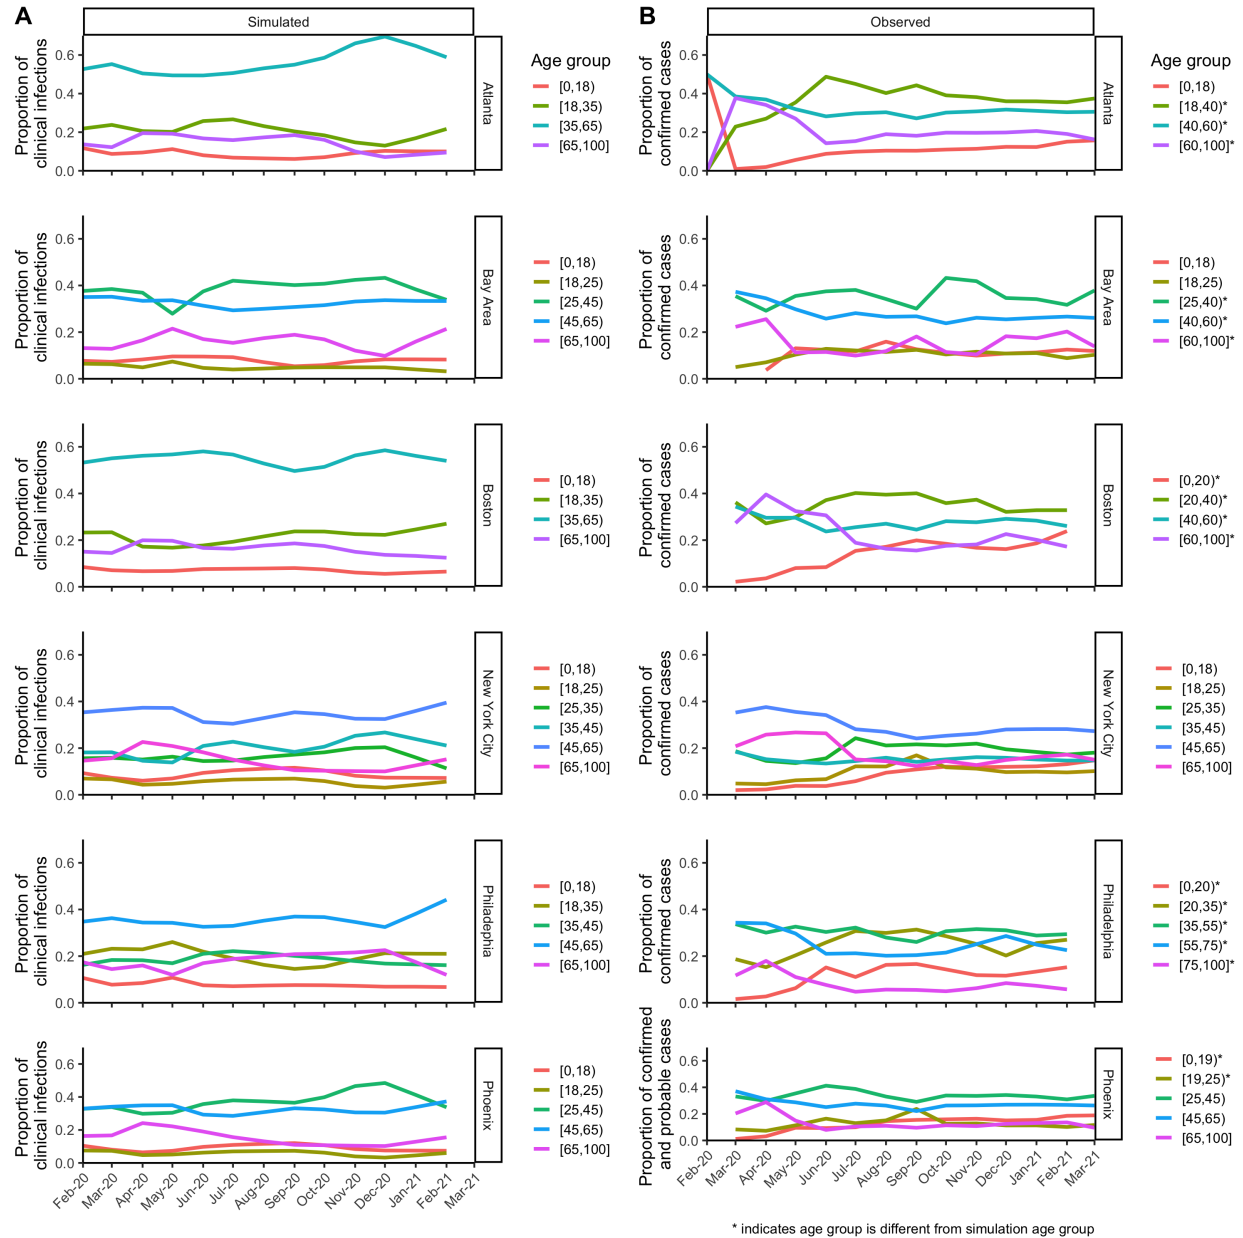

Figure S9: Comparisons of the proportion of clinical infections estimated from the mechanistic model vs. observed data for each DMA. A) Proportion of simulated clinical infections by age group in each DMA, aggregated by month. Note that the age groups presented for each DMA are different in order to align the simulated and observed data as closely as possible. B) Observed proportion of cases by age group in each DMA, aggregated by month. Note that except for New York City, the age groups presented in the observed data do not perfectly match those from the simulation. Data for Atlanta DMA are based on the daily number of new confirmed cases by age group for Georgia state (*COVID-19 Status Report*, 2021). Data for the San Francisco Bay Area DMA are based on the daily number of new confirmed cases by age group for the city of San Francisco (*COVID-19 Cases Summarized by Age Group*, 2021). Data for Boston DMA are based on the weekly proportion of positive test results by age group for Massachusetts state (*Archive of COVID-19 cases in Massachusetts (COVID-19 Raw Data - March 22, 2021)*, 2021). Data for New York City DMA are based on the weekly proportion of positive test results by age group for New York City (*Coronavirus Data*, 2021). Data for Philadelphia DMA are based on the weekly number of confirmed cases per 10,000 population by age group for the city of Philadelphia, which were then combined with demographic data from ACS (*Testing data (Trends, Infections by Age)*, 2021). Data for Phoenix DMA are based on the weekly number of confirmed and probable COVID-19 cases by age group for Maricopa County (*Dashboard: Weekly confirmed and probably COVID-19 cases over time by age group*, 2021). Except for Boston, data were summed over days or weeks to aggregate to months. For Boston, the third week of each month was selected to represent the month's value.

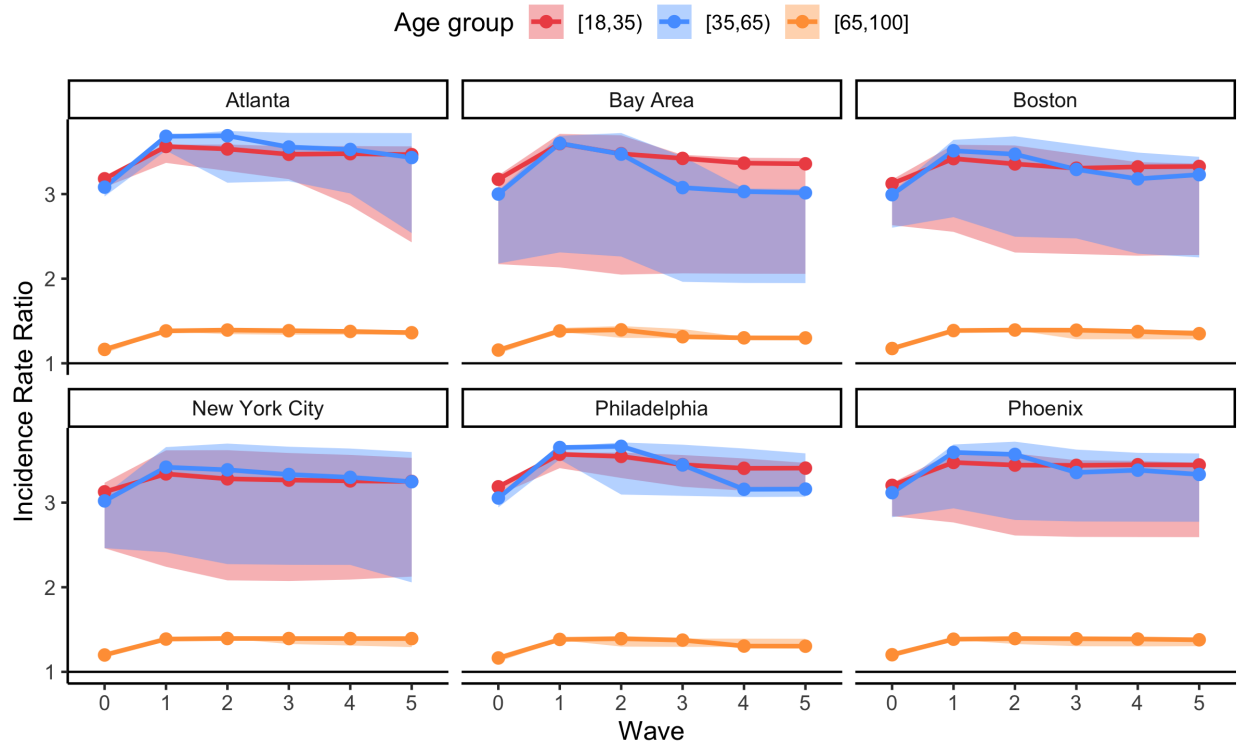

Figure S10: Mechanistic model results of total incidence for four age groups using alternative contact rate data. Simulated incidence rate ratio (IRR) using total incidence for each DMA and BICS survey wave comparing 18-34, 35-64, and 65+ year olds to the reference age group of 0-17 year olds. 90% uncertainty bounds are estimated from running 1,000 simulations with 1,000 different values of  $R_0$ . The mathematical model is parameterized using pre-pandemic synthetic contact rate estimates that have been scaled at each BICS survey wave using information from the BICS study.

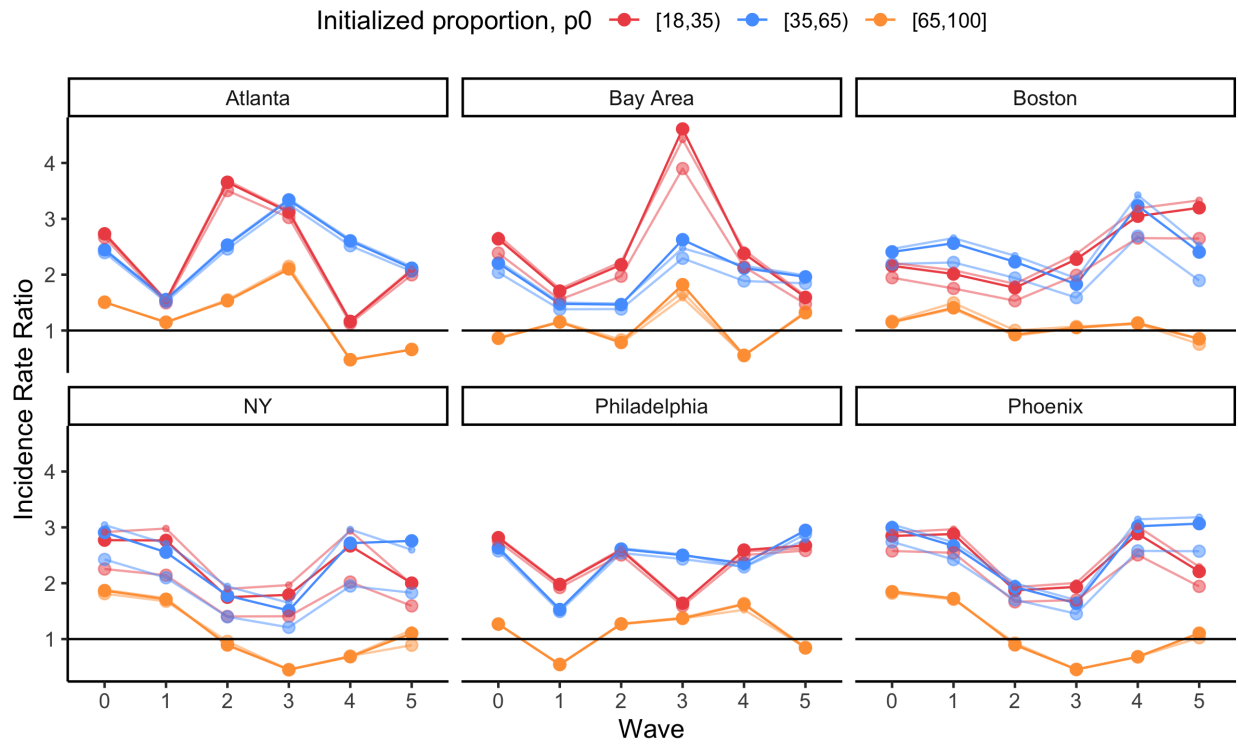

Figure S11: Mechanistic model results of total incidence for four age groups with varied  $p_0$ , using BICS contact rate data. Simulated incidence rate ratio (IRR) using total incidence for each DMA and BICS survey wave comparing 18-34, 35-64, and 65+ year olds to the reference age group of 0-17 year olds. Solid colored lines represent results when simulations are seeded with  $p_0 = 0.0001$ . Lighter colored lines for each age group represent simulations seeded with  $p_0 = 0.00002$  and  $p_0 = 0.0005$  as sensitivity analyses. The mathematical model is parameterized using empirical contact rate estimates from the BICS study.
